# Supplementary material for: Accessing Unusual Reactivity through Chelation-Promoted Bond Weakening
Source: PubMed Central journal article supplement — Inorg Chem. 2023 Mar 13;62(12):5040–5. doi: 10.1021/acs.inorgchem.3c00298 (PMC10249415; doi:10.1021/acs.inorgchem.3c00298), 2023-03-13
Supplement: ic3c00298_si_001.pdf [file ic3c00298_si_001.pdf]

# Accessing Unusual Reactivity through Chelation-Promoted Bond Weakening

Nicholas G. Boeckell<sup>1</sup>, Caroline O. Bartulovich<sup>1</sup>, Sandeepan Maity<sup>2</sup>, Robert A. Flowers II<sup>1,\*</sup>

<sup>1</sup>Department of Chemistry, Lehigh University, Bethlehem, PA, USA 18015

<sup>2</sup>Department of Chemistry, C. V. Raman Global University, Bhubaneswar, Odisha-752054, India

\*email: rof2@lehigh.edu

## Supporting Information

| <b>Contents</b>                                                                 | <b>Page</b> |
|---------------------------------------------------------------------------------|-------------|
| 1. Instrumentation                                                              | S2          |
| 2. Materials for Kinetic and Synthetic Reactions                                | S2          |
| 3. Synthetic Yields and Procedures                                              | S2-5        |
| 4. Kinetic Conditions for SmBr <sub>2</sub> -NMEA Reductions                    | S5          |
| 5. Rate of Decay of SmBr <sub>2</sub> -NMEA                                     | S6          |
| 6. Sample k <sub>obs</sub> Determination                                        | S7          |
| 7. Kinetic Conditions and Data for SmBr <sub>2</sub> -NMEA-1-methoxynaphthalene | S8-12       |
| 8. Conductivity Experiments                                                     | S12-14      |
| 9. Hydrogen Gas Evolution Experiments                                           | S14         |
| 10. UV-Vis Spectra of SmBr <sub>2</sub>                                         | S15-16      |
| 11. <sup>1</sup> H NMR Spectra of Products                                      | S17-26      |
| 12. <sup>13</sup> C NMR Spectra of Products                                     | S27-33      |
| 13. Computational Details                                                       | S34-45      |
| 14. References                                                                  | S45-46      |

## **1. Instrumentation:**

Proton NMR spectra were recorded on a Bruker 400 MHz spectrometer in  $\text{CDCl}_3$ . Carbon NMR were performed at 125 MHz in  $\text{CDCl}_3$ . GC-MS analyses were performed with a Shimadzu GCMS-QP2010 Ultra. GC analyses were performed using a Shimadzu Gas Chromatograph GC-2010 Plus with biphenyl as an internal standard. Kinetic experiments were performed with a computer-controlled SX.18 MV stopped-flow spectrophotometer (Applied Photophysics Ltd. Surrey, UK). The kinetic solutions were injected separately into the stopped-flow system from airtight Hamilton syringes prepared in a glove box. The cell block and the drive syringes of the stopped flow reaction analyzer were flushed a minimum of three times with dry, deoxygenated THF to make the system anaerobic. Between each experiment, the cell block was washed with dilute  $\text{HNO}_3$  (2x), DI  $\text{H}_2\text{O}$  (3x), and THF (3x) before additional anhydrous deoxygenated THF washes (3x). The reaction rates were determined from the decay of  $\text{SmBr}_2$  at 540 nm.

## **2. Materials for Synthetic and Kinetic Studies:**

Samarium powder was purchased from Acros Organics.  $\text{SmI}_2$  was generated by the standard method of samarium metal combined with iodine in THF and allowed to stir for at least 4 hours.<sup>1</sup> Iodometric titrations were performed to verify concentration of  $\text{SmI}_2$ . 1-methoxynaphthalene was purchased from Alfa Aesar. All chemicals were used without further purification. Substrates were stored over sieves and deoxygenated prior to use. Tetrahydrofuran was purified by a Solvent Purification system (Innovative Technology Inc.; MA).

## **3. Experimental Methods:**

### **Procedure for Preparation of $\text{SmBr}_2$**

$\text{SmI}_2$  was generated by the standard method of samarium metal combined with iodine in THF and allowed to stir for at least 4 hours. The solution of  $\text{SmI}_2$  was then allowed to settle and the supernatant was withdrawn and added to a flame dried vial equipped with a magnetic stir bar. This solution was further charged with four equivalents of either tetrabutylammonium bromide (TBABr) or LiBr and allowed to stir for 15 minutes until the solution was observed to change color from the characteristic blue of  $\text{SmI}_2$  to the deep purple of samarium dibromide ( $\text{SmBr}_2$ ).

### **Synthetic Procedure for the GC Yield:**

Substrate (0.33 mmol arenes, 0.2 mmol esters, 0.33 mmol alkynes, 0.33 mmol N-containing substrates) was added to a 10 mL solution of 0.1 M SmBr<sub>2</sub> in a flame dried vial equipped with a magnetic stir bar under an argon atmosphere. Under stirring, NMEA (15 mmol, 1.2 mL) was added to the solution, which was allowed to react until discoloration of the characteristic purple of SmBr<sub>2</sub> was observed. Quenching of the solution in air and with 0.1 M HCl was followed by the addition of biphenyl (0.33 mmol, 0.051 g for arenes, alkynes, and N-containing substrates; 0.031 g for esters). The solution was then extracted into diethyl ether and dried over magnesium sulfate. The dry solution was then analyzed by GCMS.

### **Synthetic Procedure for Product Isolation:**

Substrate (0.33 mmol arenes, 0.2 mmol esters, 0.33 mmol alkynes) was added to a 10 mL solution of 0.1 M SmBr<sub>2</sub> in a flame dried vial equipped with a magnetic stir bar under an argon atmosphere. Under stirring, NMEA (15 mmol, 1.2 mL) was added to the solution, which was allowed to react until discoloration of the characteristic purple of SmBr<sub>2</sub> was observed. Quenching of the solution in air and with 0.1 M HCl was followed by extraction into diethyl ether and drying of the combined organic layers over magnesium sulfate. The dry solution was then concentrated under reduced pressure.

### **Synthetic Procedure for Ester Olefin Cyclization with SmBr<sub>2</sub>-NMEA:**

Substrate (0.25 mmol) was reacted with 1.5 mmol of SmBr<sub>2</sub> and 6 mmol of NMEA at room temperature in dry and degassed THF for 24 hrs. Quenching of the solution in air and with 0.1 M HCl was followed by extraction into dichloromethane and drying of the combined organic layers over magnesium sulfate. Organic layers were concentrated over reduced pressure for NMR of crude samples. The products were purified with column chromatography using silica as stationary phase and hexanes/ethyl acetate as eluting solvent.

### **<sup>13</sup>C NMR Data of the Products:**

#### **2-benzyl-5-methylcyclopentan-1-ol:**

<sup>1</sup>H NMR: 1H NMR: 7.36-7.16 (m, 5H); 3.81-3.67 (m, 1H); 2.94-2.52 (m, 2H); 2.26-1.06 (m, 5H); 1.03-0.96 (d, 3H)

<sup>13</sup>C NMR: 141.98, 128.96, 128.88, 128.44, 125.83, 80.99, 45.2, 42.42, 35.48, 31.05, 29.1, 19.94 (1<sup>st</sup> isomer); 141.29, 128.96, 128.88, 128.44, 125.83, 80.04, 48.71, 40.74, 37.55, 30.7, 29.02, 14.05 (2<sup>nd</sup> isomer).

**2-methyl-5-(3-methoxybenzyl)cyclopentan-1-ol:**

<sup>1</sup>H NMR: 7.25-7.16 (m, 1H); 6.88-6.70 (m, 3H); 3.8-3.78 (s, 3H); 3.78-3.67 (m, 1H); 2.94-2.46 (m, 2H); 2.27-1.03 (m, 6H); 1.02-0.96 (d, 3H).

<sup>13</sup>C NMR: 159.6; 143.63; 129.31; 121.31; 114.65; 111.15; 80.92; 55.14; 55.14; 45.02; 42.25; 37.47; 30.96; 29.03; 19.86 (1<sup>st</sup> isomer); 159.6; 142.9; 129.3; 121.26; 114.63; 110.9; 79.96; 48.46; 40.71; 35.47; 30.63; 28.93; 14.02 (2<sup>nd</sup> isomer).

**2-methyl-5-(3-methylbenzyl)cyclopentan-1-ol:**

<sup>1</sup>H NMR: 7.24-7.17 (m, 1H); 7.11-7.00 (m, 3H); 3.82-3.68 (m, 1H); 2.92-2.49 (m, 2H); 2.38-2.35 (s, 3H); 2.27-1.05 (m, 6H); 1.04-0.99 (d, 3H).

<sup>13</sup>C NMR: 141.21; 137.93; 129.75; 128.30; 126.70; 125.92; 80.99; 45.17; 42.3; 37.49; 31.03; 29.11; 19.91 (1<sup>st</sup> isomer); 141.21; 137.92; 129.66; 128.30; 126.54; 125.84; 80.00; 48.67; 40.67; 35.38; 30.68; 29.01; 21.52; 14.06 (2<sup>nd</sup> isomer).

**2-allyl-5-methylcyclopentan-1-ol:**

<sup>1</sup>H NMR: 5.92-5.75 (m, 1H); 5.11-4.96 (m, 2H); 3.75-3.65 (m, 1H); 2.33-1.01 (m, 8H); 1.01-0.96 (d, 3H).

<sup>13</sup>C NMR: 137.76; 115.69; 81.14; 46.68; 39.06; 37.81; 30.81; 28.98; 13.9 (one isomer)

**Mass Spectrometric Data**

HRMS data of 2-methyl-5-(3-methoxybenzyl)cyclopentan-1-ol.

Measured m/z: 243.136718; ion formula: C<sub>14</sub>H<sub>20</sub>NaO<sub>2</sub> expected m/z 243.135551

HRMS data of 2-methyl-5-(3-methylbenzyl)cyclopentan-1-ol.

Measured m/z: 227.142162; Ion formula: C<sub>14</sub>H<sub>20</sub>NaO expected: m/z: 227.140636.

GC-MS data of 2-allyl-5-methylcyclopentan-1-ol

Measured m/z: 140.1201; Ion formula: C<sub>9</sub>H<sub>16</sub>O, expected: m/z: 140.1197

Measured m/z: 122.1096 (M-H<sub>2</sub>O peak); Ion formula C<sub>9</sub>H<sub>14</sub>, expected m/z: 122.1068.

**Synthetic Procedure for Reduction of 1d with SmBr<sub>2</sub>-water-Et<sub>3</sub>N:**

Substrate (0.09 g, 0.36 mmol) was added to a 15 mL solution of 0.1 M SmBr<sub>2</sub> in a flame dried vial equipped with a magnetic stir bar under an argon atmosphere. Under stirring, Et<sub>3</sub>N (3.7 mmol) followed by water (7.5 mmol) were added to the solution, which was allowed to react

until discoloration of the characteristic purple of  $\text{SmBr}_2$  was observed. Quenching of the solution in air and with 0.1 M HCl was followed by extraction into diethyl ether and drying of the combined organic layers over magnesium sulfate. The dry solution was then concentrated under reduced pressure. This reaction yielded 37% of the cyclized product **2d**, 35% of the acyclic reduced alcohol, and 27% of the unreacted starting material.

#### **Generation Procedure for synthesis of substrates for Ester-Olefin cyclization**

1 g (0.0078 mol) of methyl hex-5-enoate was dissolved in 20 mL of dry THF and taken in 100 ml of three neck round bottom flask. With the help of a syringe, 5 mL of 2.0 M LDA (in THF/heptane/ethyl benzene) was added slowly maintaining the temperature at  $-78^\circ\text{C}$ . After 30 min, 0.0085 mol of corresponding electrophile (benzyl bromide, m-methyl benzyl bromide and m-methoxy benzyl bromide) dissolved in 5 mL of dry THF was added slowly to the reaction mixture keeping the temperature  $-78^\circ\text{C}$ . After 2 hrs, the reaction was allowed to reach the room temperature. The reaction was quenched with slow addition of  $\text{Na}_2\text{SO}_4$  solution. The reaction mixture was worked up using diethyl ether and dilute HCl solution. The organic layers were combined and concentrated under the reduced pressure. The products were purified with column chromatography using silica as stationary phase and hexanes/ethyl acetate as eluting solvent.

#### **4. Kinetic Conditions for $\text{SmBr}_2$ -NMEA Reductions:**

Kinetic experiments were performed with a computer-controlled SX.18 MV stopped-flow spectrophotometer (Applied Photophysics Ltd. Surrey, UK). Solutions were injected separately into the stopped-flow system using airtight, capped BD syringes prepared in a glove box under argon atmosphere. Between each experiment, the cell block was washed with dilute  $\text{HNO}_3$  (1x), Deionized  $\text{H}_2\text{O}$  (1x), and THF (3x) before additional anhydrous deoxygenated THF washes (3x). The reaction rates were determined from the decay of  $\text{SmBr}_2$  at 540 nm. Kinetic measurements were carried out at  $25^\circ\text{C}$  unless otherwise specified.

## 5. Rate of Decay of SmBr<sub>2</sub>-NMEA

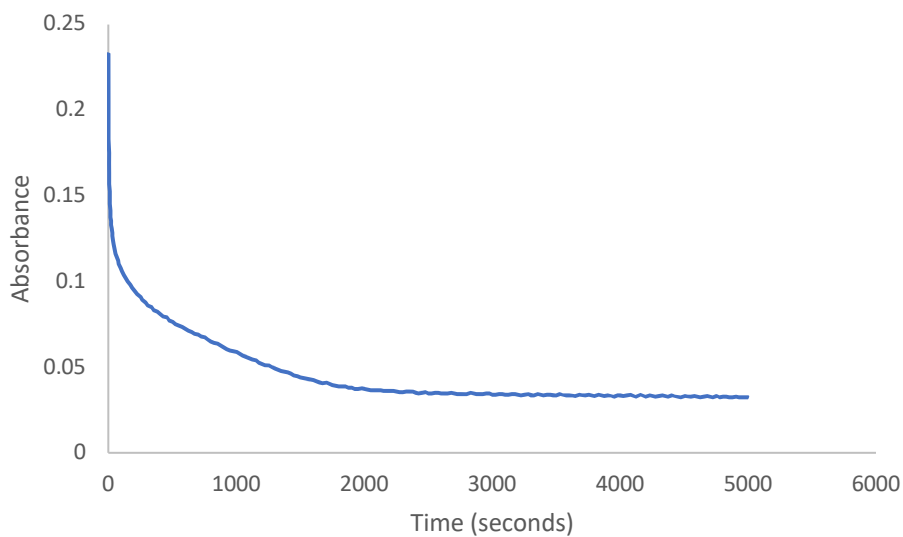

**Figure S1.** Sample decay curve for SmBr<sub>2</sub>-NMEA in the absence of substrate

**Table S1:** Table of the rate of decay of SmBr<sub>2</sub>-NMEA complexes in the absence of substrate

| Proton Donor         | Concentration of Proton Donor | Rate of Natural Decay (s <sup>-1</sup> ) |
|----------------------|-------------------------------|------------------------------------------|
| N-Methylethanolamine | 0.15 M                        | 0.0014                                   |

## 6. Sample Determination of $k_{\text{obs}}$ under Pseudo-first Order Conditions:

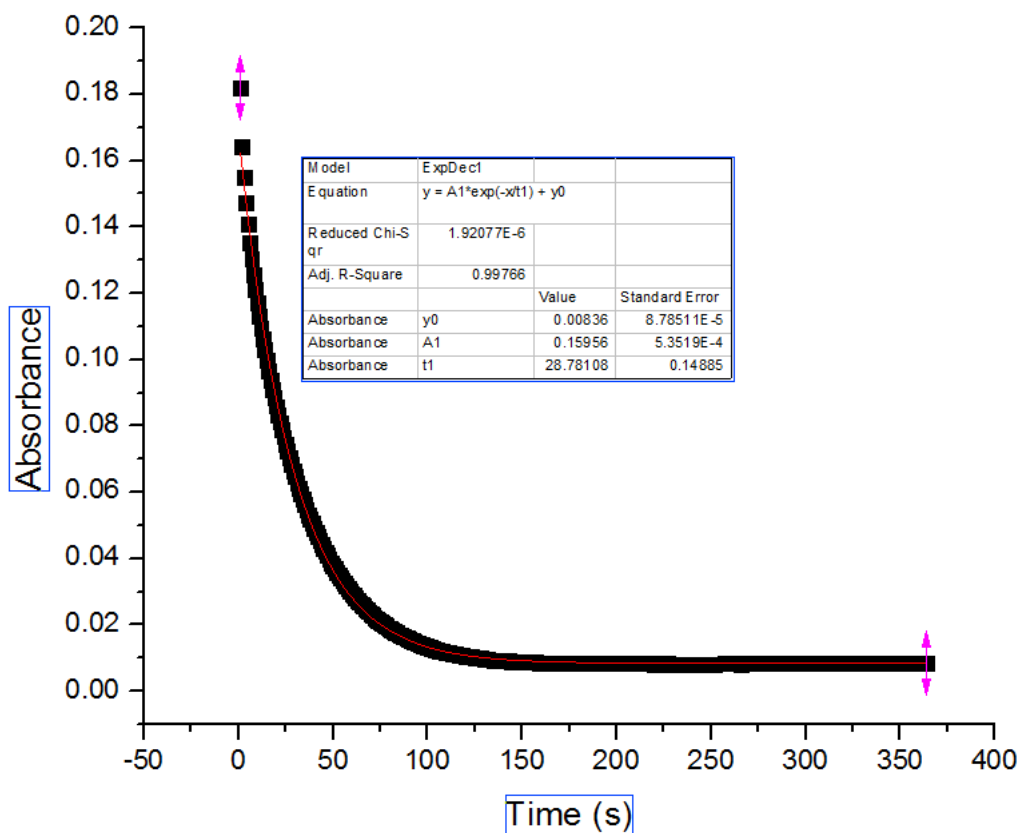

**Figure S2.** Plot of the decay of 10 mM Sm(II) at 540 nm in the presence of excess 1-methoxynaphthalene and N-Methylethanolamine fit to a single exponential equation where  $y = y_0 + A \cdot (R_0 \cdot x)$  and  $k_{\text{obs}}$  is represented by  $|R_0|$ .

## 7. Kinetic Conditions and Data for Reduction of 1-methoxynaphthalene:

All kinetic data in this section was measured under the conditions described in Section 5, unless specified.

### Sample Decay SmBr<sub>2</sub>-2-methylamino ethanol-1-methoxynaphthalene:

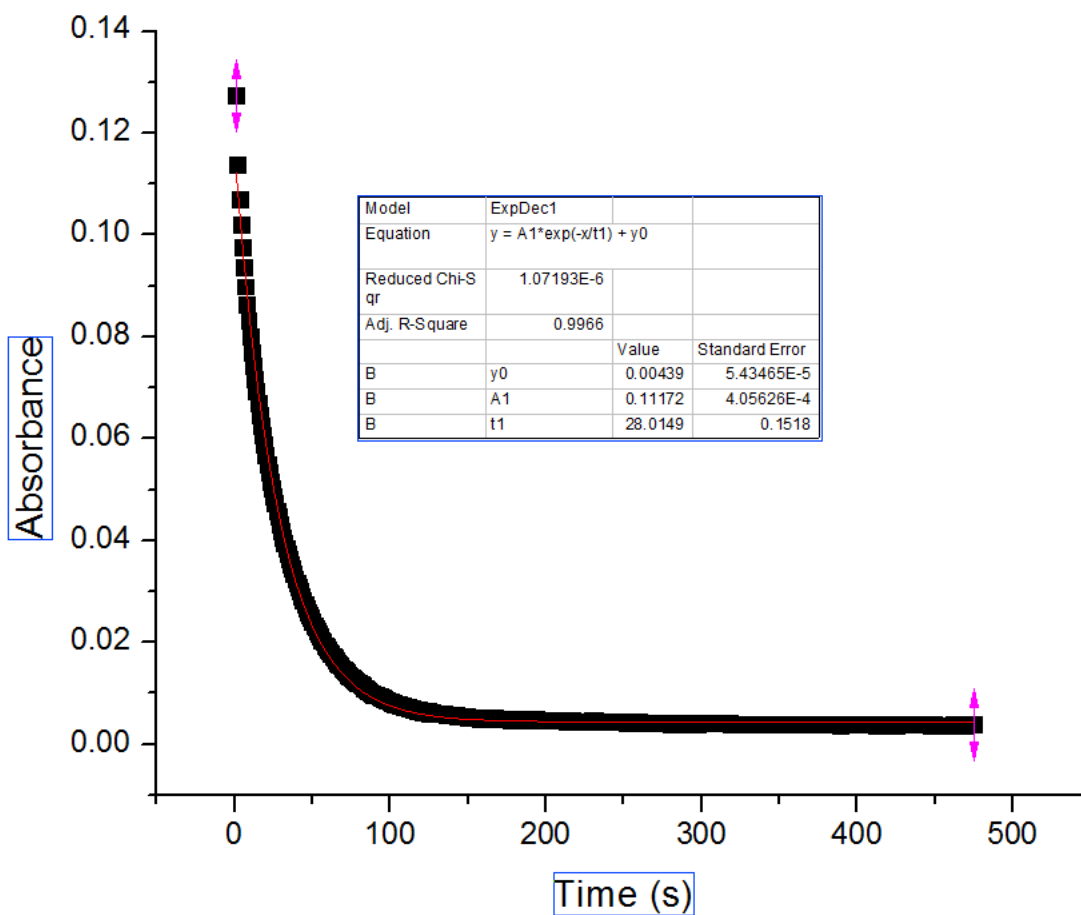

**Figure S3.** Sample decay for 0.15 M 2-methylaminoethanol, 100 mM 1-methoxynaphthalene, 10 mM SmBr<sub>2</sub>, measured at 25 °C, 540 nm fit to a single exponential equation to provide  $k_{\text{obs}}$ .



### Order of 2-methylamino ethanol:

For the order of water, the concentration of 1-methoxynaphthalene was kept constant at 100 mM and was combined with 10 mM SmBr<sub>2</sub>. Concentration of 2-methoxynaphthalene was varied from 50-250 mM at 25 °C.

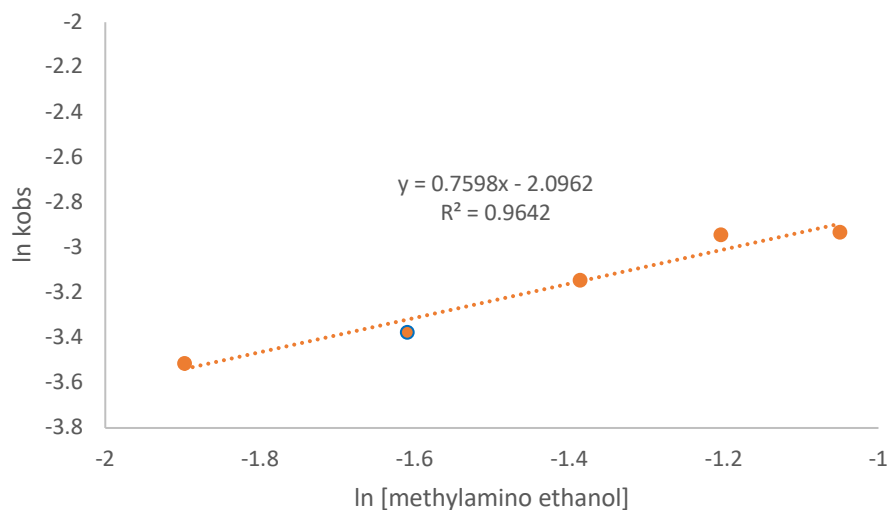

**Figure S4.** Plot of the reduction of 100 mM 1-methoxynaphthalene with 10mM SmBr<sub>2</sub> with [2-methylamino ethanol] varied from 50-250 mM.

### Order and Rate Constant of 1-methoxynaphthalene:

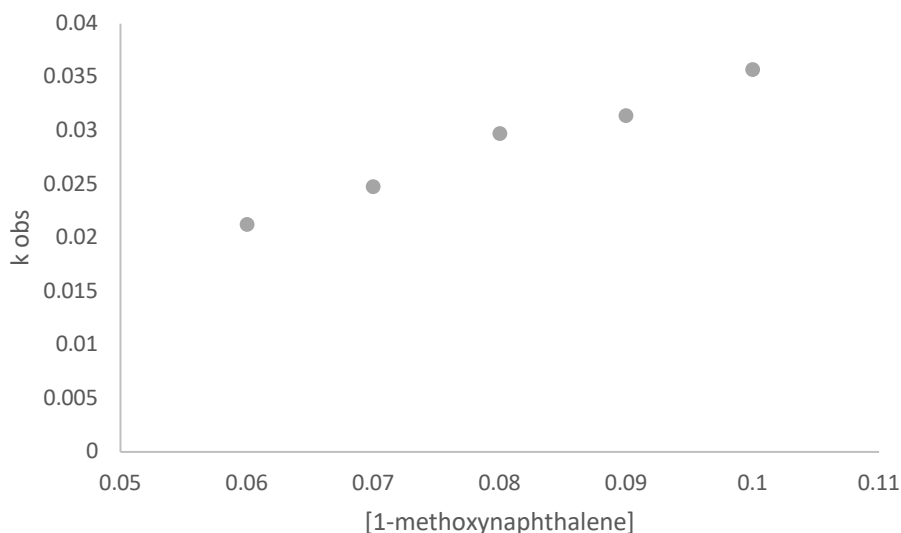

**Figure S5.** Plot of  $k_{obs}$  vs. concentration of anthracene with 10 mM SmBr<sub>2</sub> and 15 equiv 2-methylamino ethanol where [1-methoxynaphthalene] is varied from 0.06 M to 0.1 M and a linear regression provides  $y = 0.49x - 0.0011$  with  $R^2 = 0.99$ .

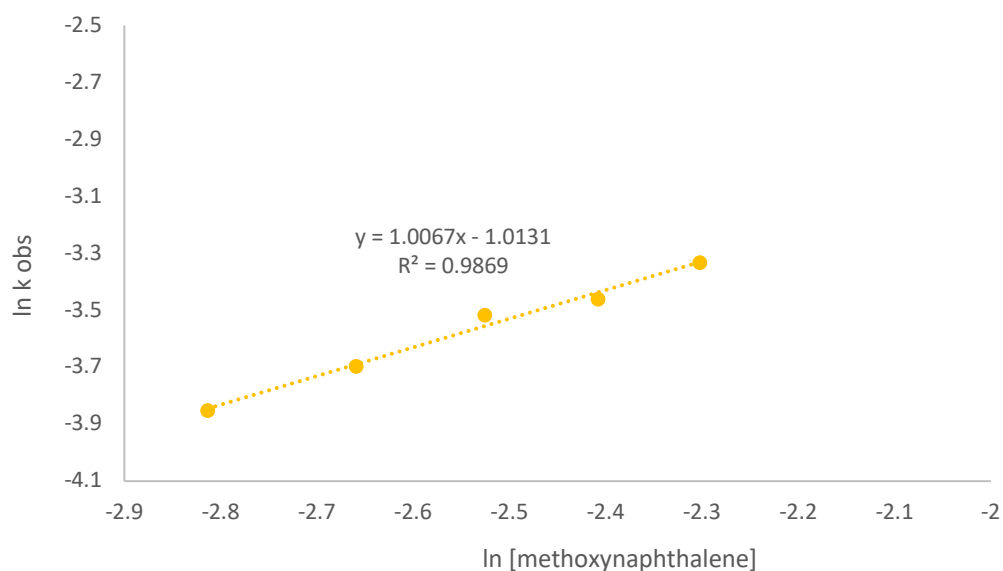

**Figure S6.** Natural log plot for  $k_{obs}$  vs. [Anthracene] where the rate order is provided by a linear regression where  $y = 1.0x + 1.0131$  with  $R^2 = 0.99$ .

#### Order of $\text{SmBr}_2$ using Fractional Times Method:

Fractional times method was applied to determine the order of  $\text{SmBr}_2$  over a range of concentrations of anthracene with a constant concentration of 0.33 M  $\text{H}_2\text{O}$ . The value for  $(t_{3/4} - t_{1/2})/t_{1/2}$  was computed for each decay to provide an order as described below.<sup>2</sup>

| [Anthracene] (mM) | Trial | $A_0$    | $A_{1/2}$ | $A_{3/4}$  | $t_{1/2}$ | $t_{3/4}$ | $(t_{3/4} - t_{1/2})/t_{1/2}$ |
|-------------------|-------|----------|-----------|------------|-----------|-----------|-------------------------------|
| 60                | A     | 0.134525 | 0.0672625 | 0.03363125 | 16        | 35        | 1.2                           |
| 60                | B     | 0.122343 | 0.0611715 | 0.03058575 | 17        | 39        | 1.3                           |
| 70                | A     | 0.128034 | 0.064017  | 0.0320085  | 12        | 30        | 1.5                           |
| 70                | B     | 0.140525 | 0.0702625 | 0.03513125 | 14        | 33        | 1.4                           |
| 80                | A     | 0.141632 | 0.070816  | 0.035408   | 12        | 30        | 1.5                           |

|     |   |          |           |            |    |                 |     |
|-----|---|----------|-----------|------------|----|-----------------|-----|
| 90  | A | 0.138176 | 0.069088  | 0.034544   | 12 | 24              | 1.0 |
| 100 | A | 0.131247 | 0.0656235 | 0.03281175 | 11 | 25              | 1.3 |
|     |   |          |           |            |    | <b>Average:</b> | 1.3 |
|     |   |          |           |            |    | <b>Order:</b>   | 1   |

**Table S2.** Fractional times table to calculate the rate order of SmBr<sub>2</sub> in the reduction of 1-methoxynaphthalene by SmBr<sub>2</sub>-NMEA

**Rate Constant:**

$$-d[\text{Sm}^{\text{II}}]/dt = k'[\text{Sm}^{\text{II}}][1\text{-methoxynaphthalene}][\text{MAE}] = k_{\text{obs}}[\text{Sm}^{\text{II}}]$$

$$k' = 3.7 \text{ M}^{-3}\text{s}^{-1}$$

**Kinetic Isotope Effect:**

**Activation Parameters for SmBr<sub>2</sub>-2-methylamino ethanol-1-methoxynaphthalene:**

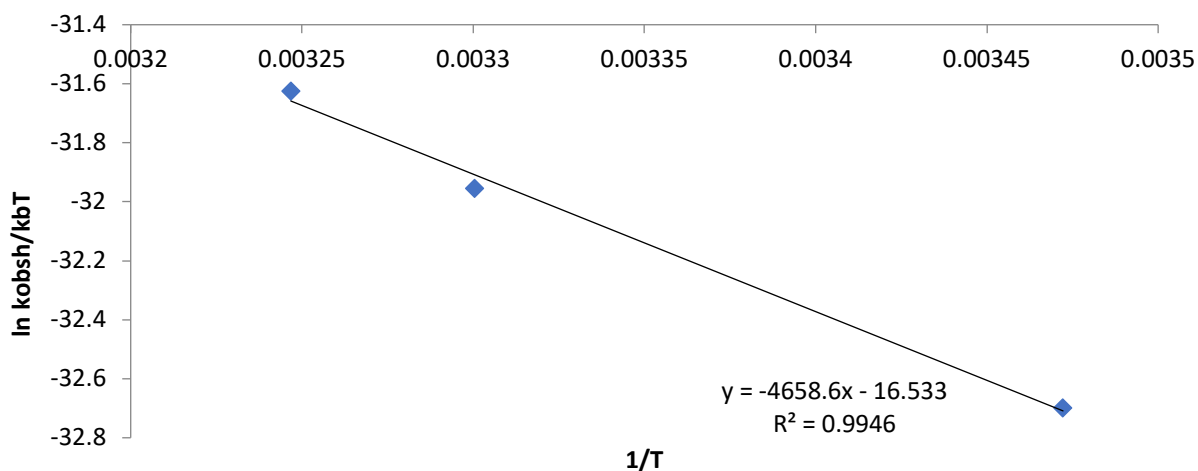

**Figure S7.** Plot of ln(k<sub>obs</sub>\*h/T\*k<sub>b</sub>) vs 1/T for the reduction of acenaphthalene by 1-methoxynaphthalene by SmBr<sub>2</sub>-NMEA

| Temp °C | Temp °K | 1/T (K <sup>-1</sup> ) | k <sub>obs</sub> | k <sub>obs</sub> h/k <sub>b</sub> T | ln k <sub>obs</sub> h/k <sub>b</sub> T |
|---------|---------|------------------------|------------------|-------------------------------------|----------------------------------------|
| 15      | 288     | 0.003472               | 0.037816         | 6.29995E-15                         | -32.6982                               |
| 20      | 293     | 0.003413               | 0.103377         | 1.69284E-14                         | -31.7098                               |
| 25      | 298     | 0.003356               | 0.125            | 2.01257E-14                         | -31.53698                              |
| 30      | 303     | 0.0033                 | 0.083838         | 1.32757E-14                         | -31.9528                               |
| 35      | 308     | 0.003247               | 0.11836          | 1.84379E-14                         | -31.6244                               |

**Figure S8.** Plot and data points for the reduction of 1-methoxynaphthalene where  $k$  was measured under constant concentrations of SmBr<sub>2</sub> (10 mM), 1-methoxynaphthalene (100 mM), and 2-methylaminoethanol (15 equiv vs Sm) with the temperature varied from 15-35 °C.

Kinetic conditions used were those described in Section 5. Each kinetic trace was measured at the specified temperature after the solutions were allowed to equilibrate to the desired temperature after ten minutes, which was monitored by a thermocouple in the reaction cell. Activation parameters were derived from the activated complex theory plot provided above and  $\Delta H^\ddagger$  and  $\Delta S^\ddagger$  were calculated as described by Espenson.<sup>3</sup> Reported values are an average of three individual trials.

## 8. Conductivity Experiments:

Analytes: SmBr<sub>2</sub>

Solvent: THF; Co-solvent: N-methylethanolamine (NMEA), N,N-dimethylethanolamine (DMEA), and ethanolamine (EA)

Instrument: VWR Scientific Conductivity Meter

Calibration: Initially the instrument was calibrated with a standard solution of known conductivity. Then the probe was rinsed with water and finally with THF several times before taking measurements.

Procedure: To SmBr<sub>2</sub> (25 mL, 2.5 mM) under argon flow, additive was added sequentially and conductivity was measured.

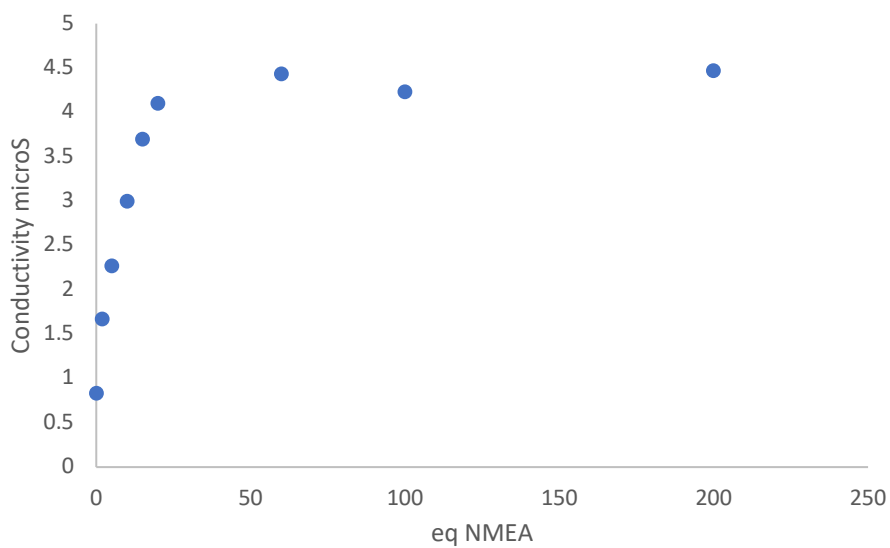

**Figure S9.** Plot of conductivity vs. equivalents of NMEA with respect to  $\text{SmBr}_2$  in THF

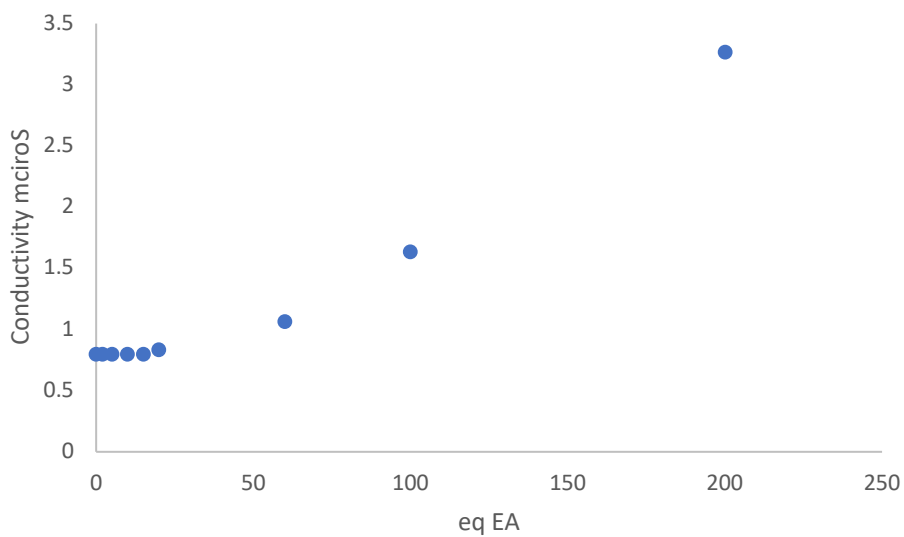

**Figure S10.** Plot of conductivity vs. equivalents of EA with respect to  $\text{SmBr}_2$  in THF

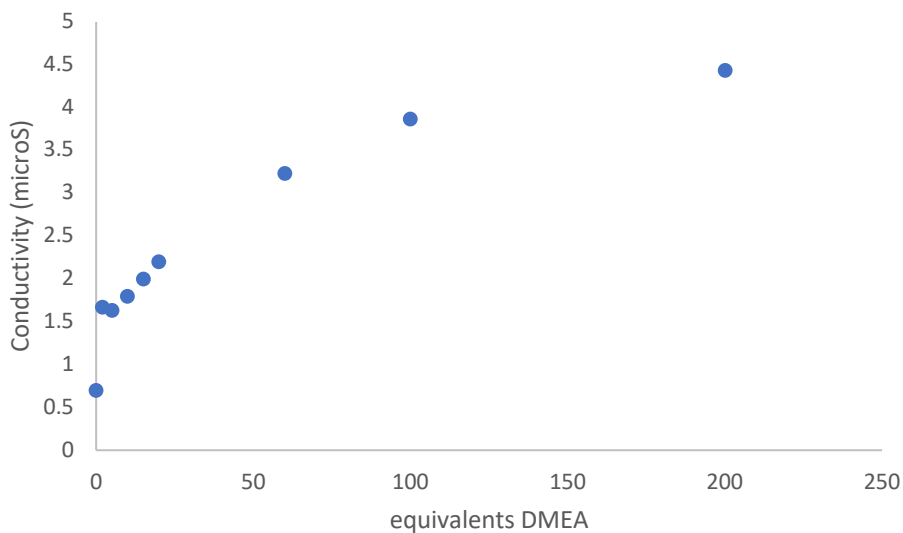

**Figure S11.** Plot of conductivity vs. equivalents of DMEA with respect to  $\text{SmBr}_2$  in THF

### 9. Hydrogen Gas Evolution Experiments:

Analytes:  $\text{SmBr}_2$

Solvent: THF; Co-solvents: DMEA, NMEA, EA

Instrument: Vernier Gas Pressure Sensor

Procedure: To  $\text{SmBr}_2$  (5 mL, 0.1 M) in a sealed test tube, stopper was removed and 200 eq additive was added, stopper was then placed back on test tube. Pressure data was then collected over a certain period of time.

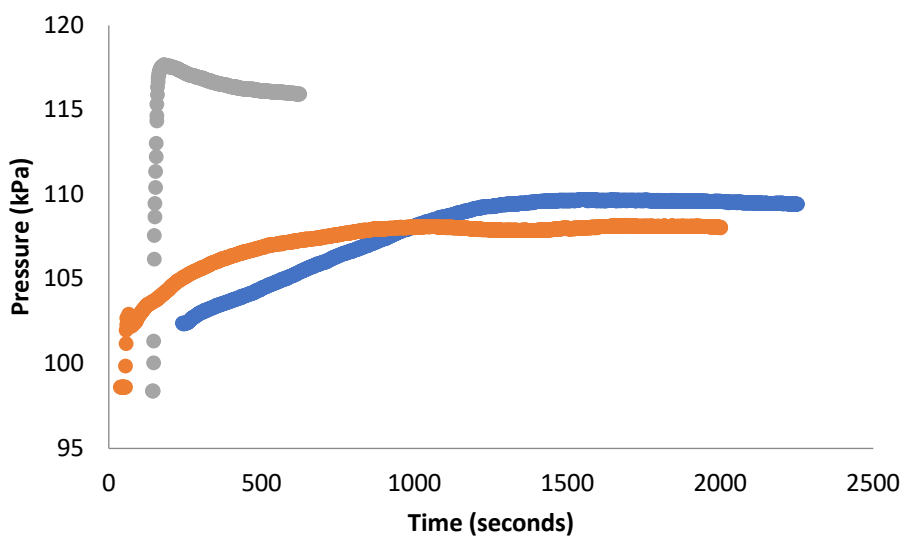

**Figure S12:** Plot of the liberation of H<sub>2</sub> gas upon addition of 200 equiv. EA (grey), NMEA (orange), and DMEA (blue) to a solution of 0.1M 0.1 M SmBr<sub>2</sub> in THF.

### 10. UV-vis Spectra of SmBr<sub>2</sub>:

Spectra were obtained using the Spectra setting for the stopped-flow spectrophotometer (described in Section 2) so that one solution of SmBr<sub>2</sub> could be generated for one syringe and would remain at a constant concentration while concentration of additive/s or substrate was changed in the other syringe. All spectra were measured at 25 °C.

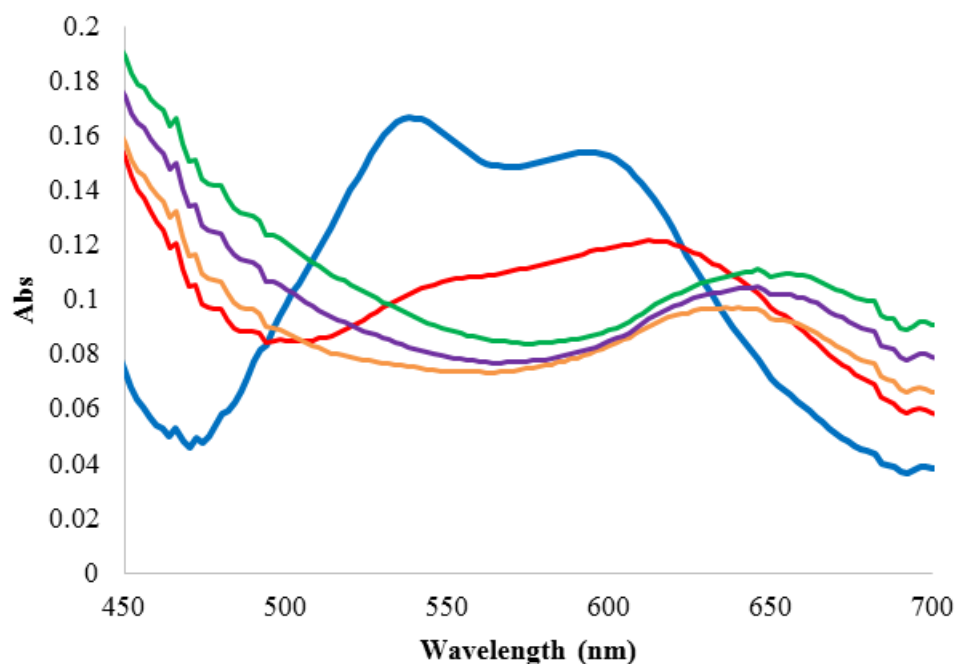

**Figure S13.** UV-Vis spectrum of SmBr<sub>2</sub> in the presence of increasing [EA] (0 eq blue, 5 eq red, 10 eq orange, 15 eq purple, 20 eq green)

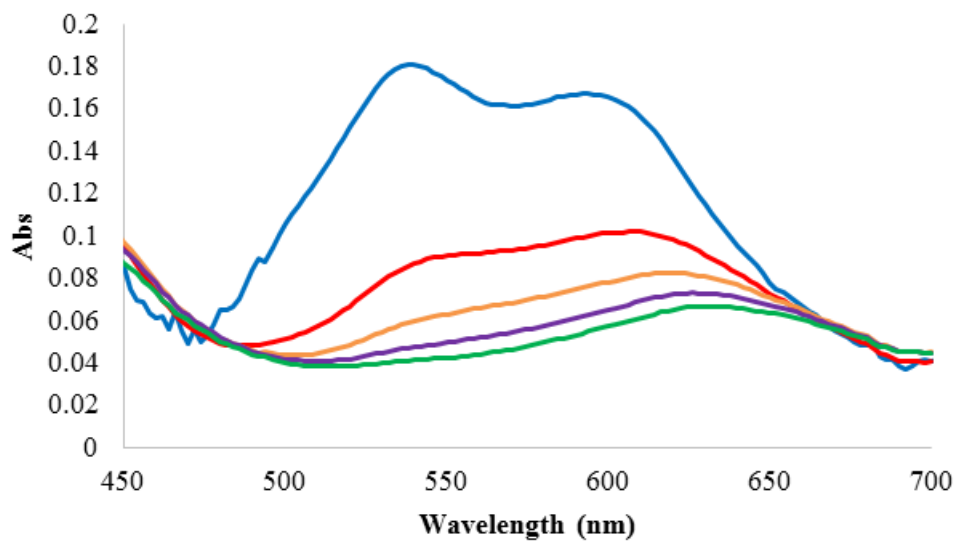

**Figure S14.** UV-Vis spectrum of  $\text{SmBr}_2$  in the presence of increasing  $[\text{NMEA}]$  (0 eq blue, 5 eq red, 10 eq orange, 15 eq purple, 20 eq green)

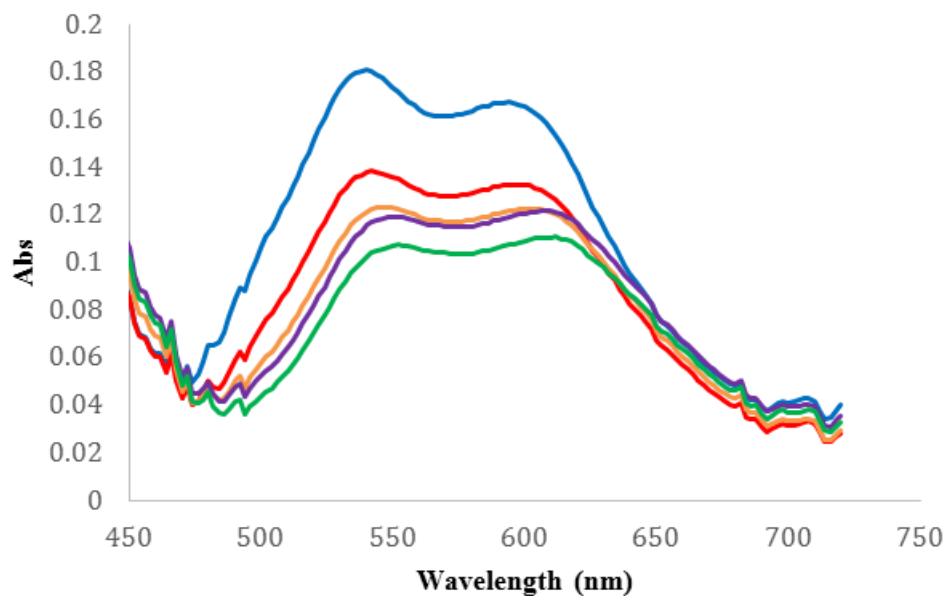

**Figure S15.** UV-Vis spectrum of  $\text{SmBr}_2$  in the presence of increasing  $[\text{DMEA}]$  (0 eq blue, 5 eq red, 10 eq orange, 15 eq purple, 20 eq green)



## 11. <sup>1</sup>H NMR Spectra of Products:

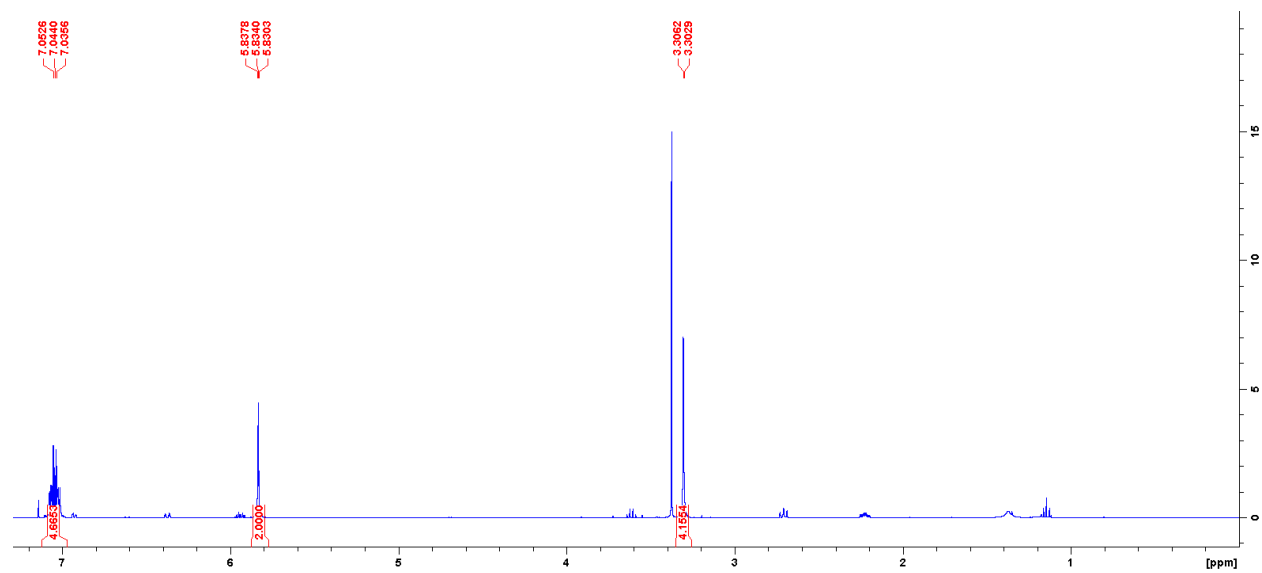

Figure S16. <sup>1</sup>H NMR spectrum of 1,4-dihydronaphthalene

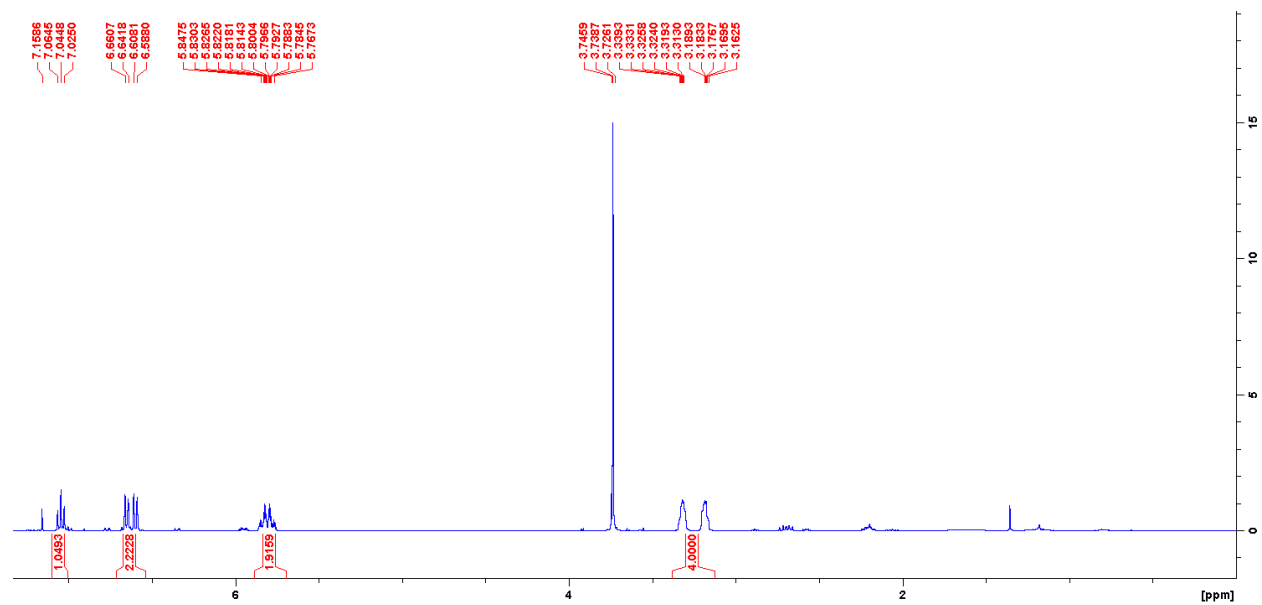

Figure S17. <sup>1</sup>H NMR spectrum of 1,4-dihydro-5-methoxynaphthalene

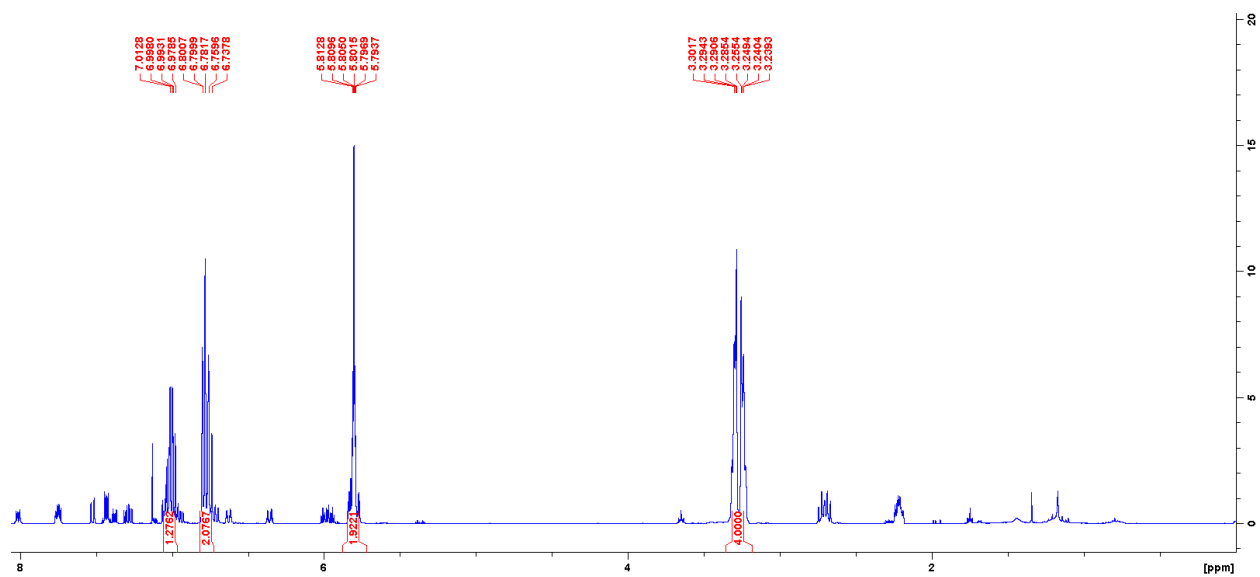

**Figure S18.**  $^1\text{H}$  NMR spectrum of 1,4-dihydro-5-fluoronaphthalene

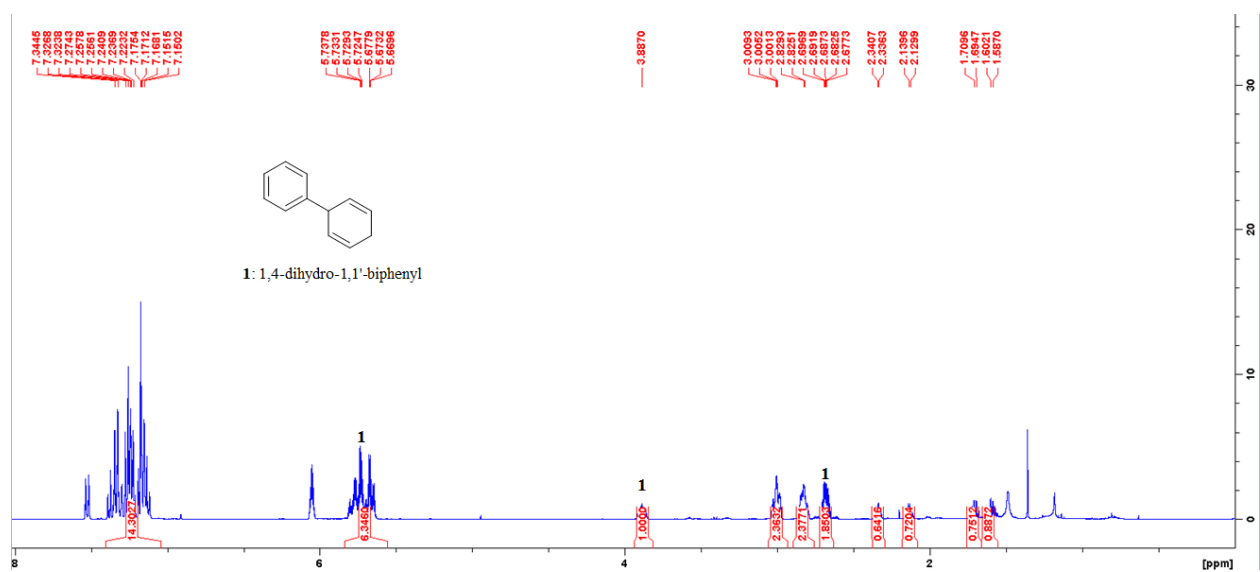

**Figure S19.**  $^1\text{H}$  NMR spectrum of the products of the reduction of biphenyl by  $\text{SmBr}_2\text{-NMEA}$

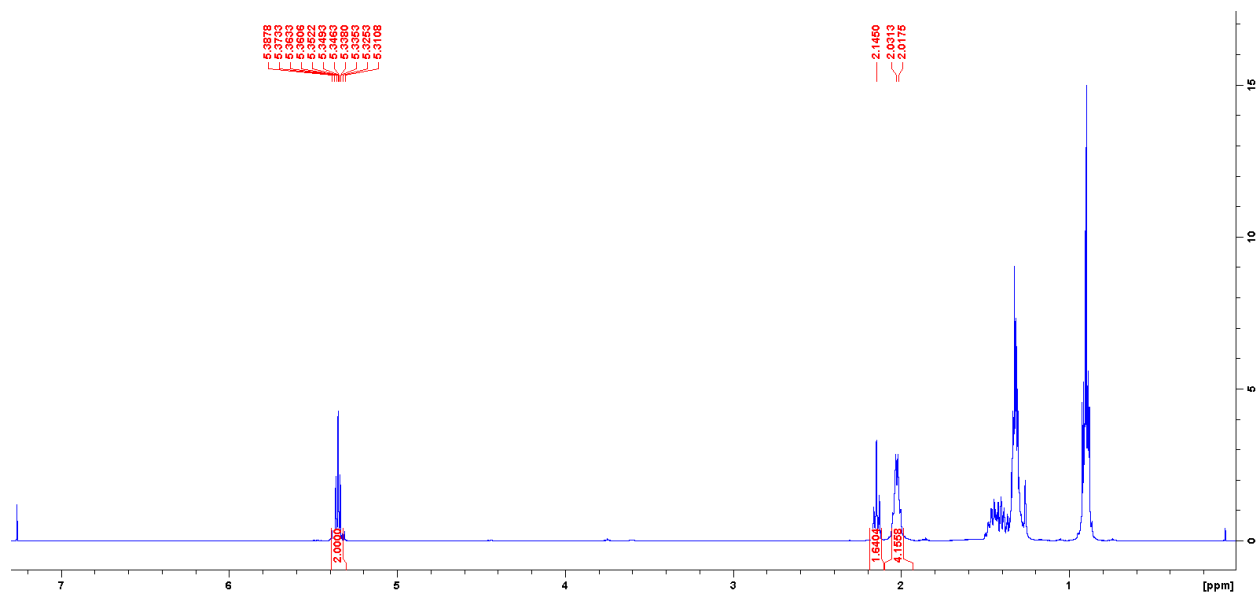

Figure S20.  $^1\text{H}$  NMR spectrum of *cis*-5-decene

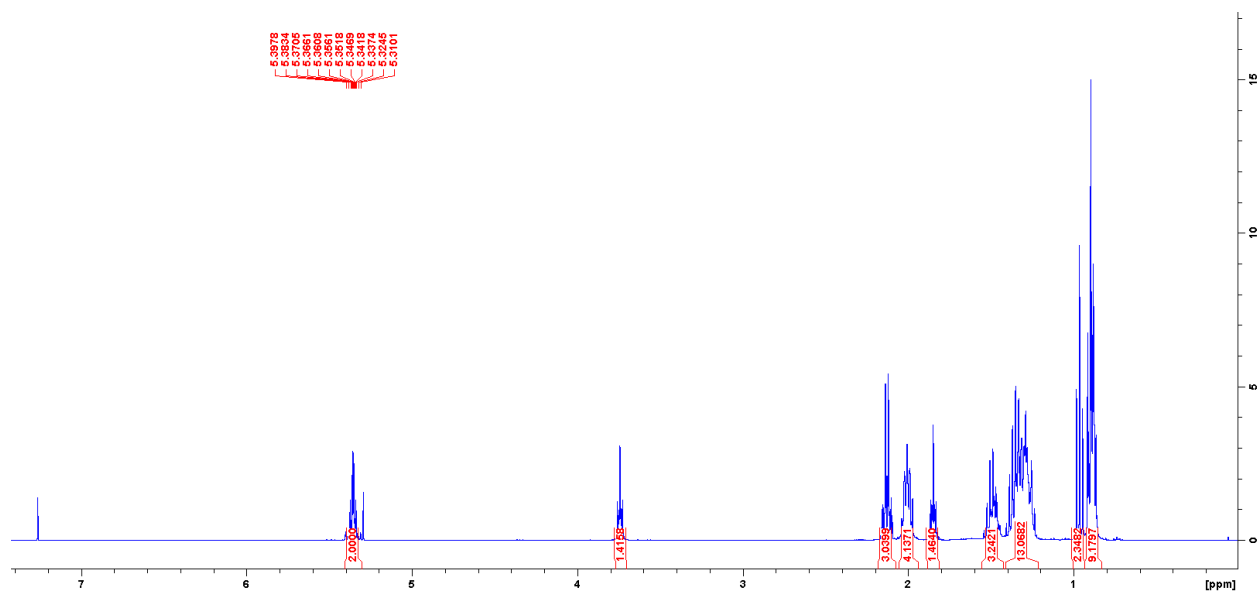

Figure S21.  $^1\text{H}$  NMR spectrum of *cis*-4-decene

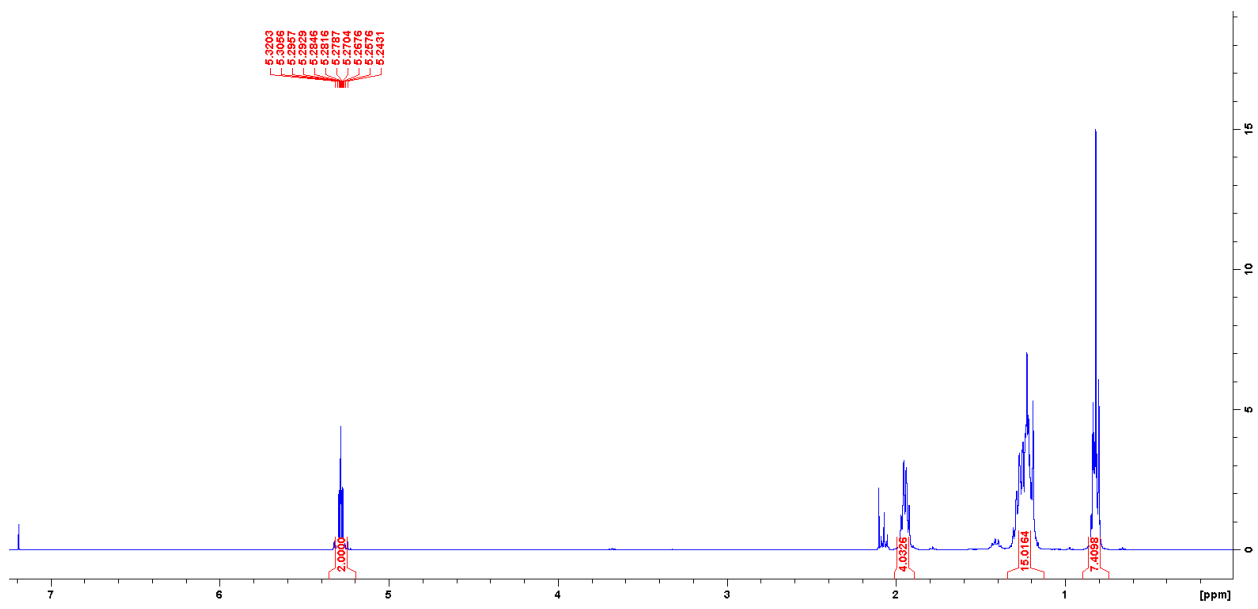

**Figure S22.**  $^1\text{H}$  NMR spectrum of *cis*-6-dodecene

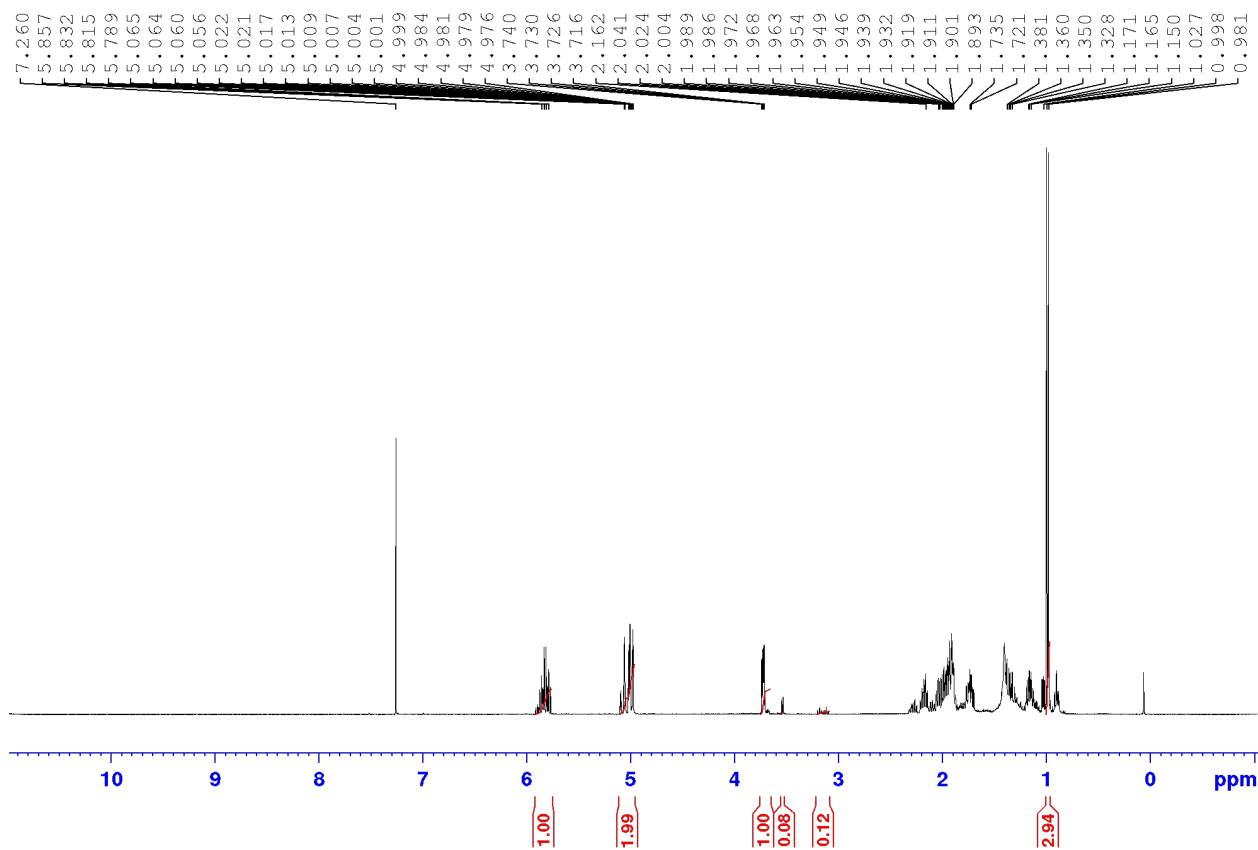

**Figure S23.**  $^1\text{H}$  NMR spectrum of 2-allyl-5-methylcyclopentan-1-ol. (peak at 7.26 corresponds to  $\text{CDCl}_3$ )

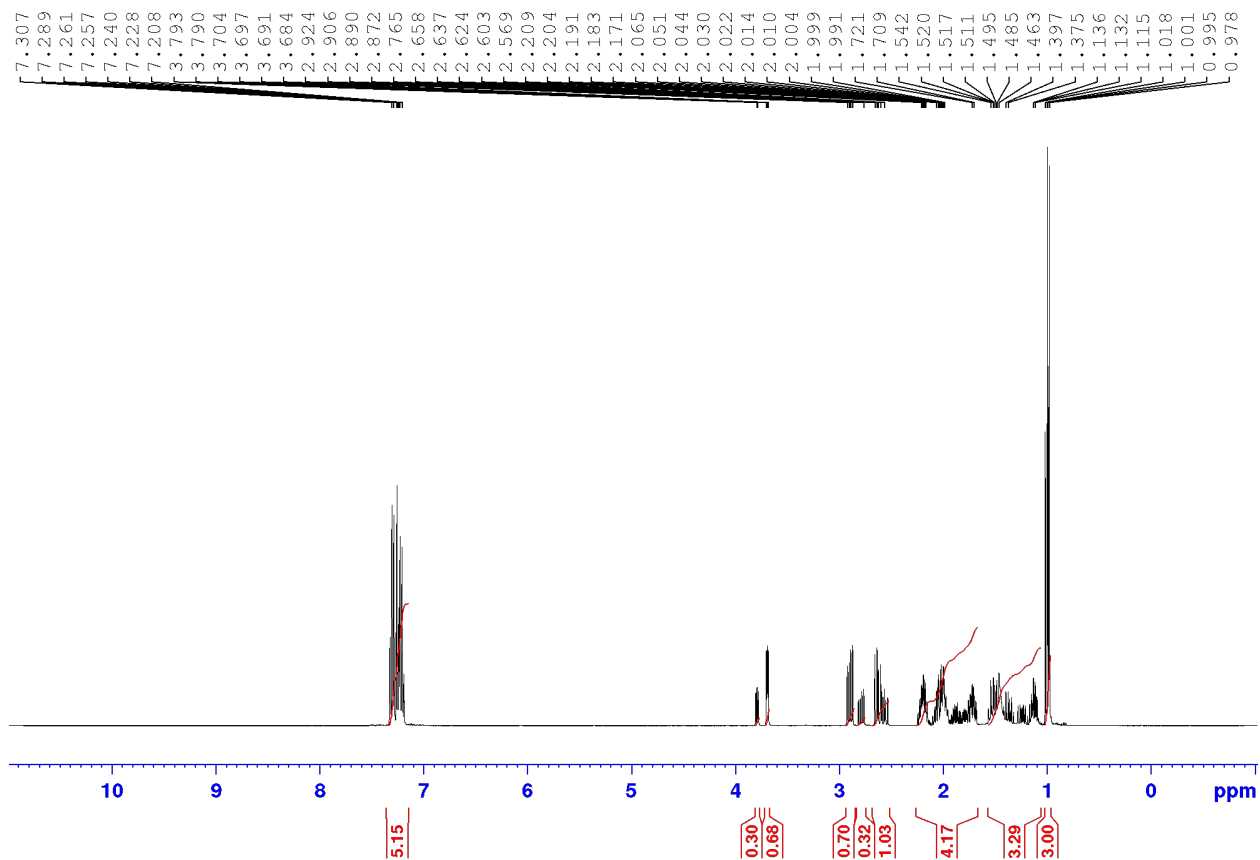

**Figure S24.**  $^1\text{H}$  NMR spectrum of 2-benzyl-5-methylcyclopentan-1-ol

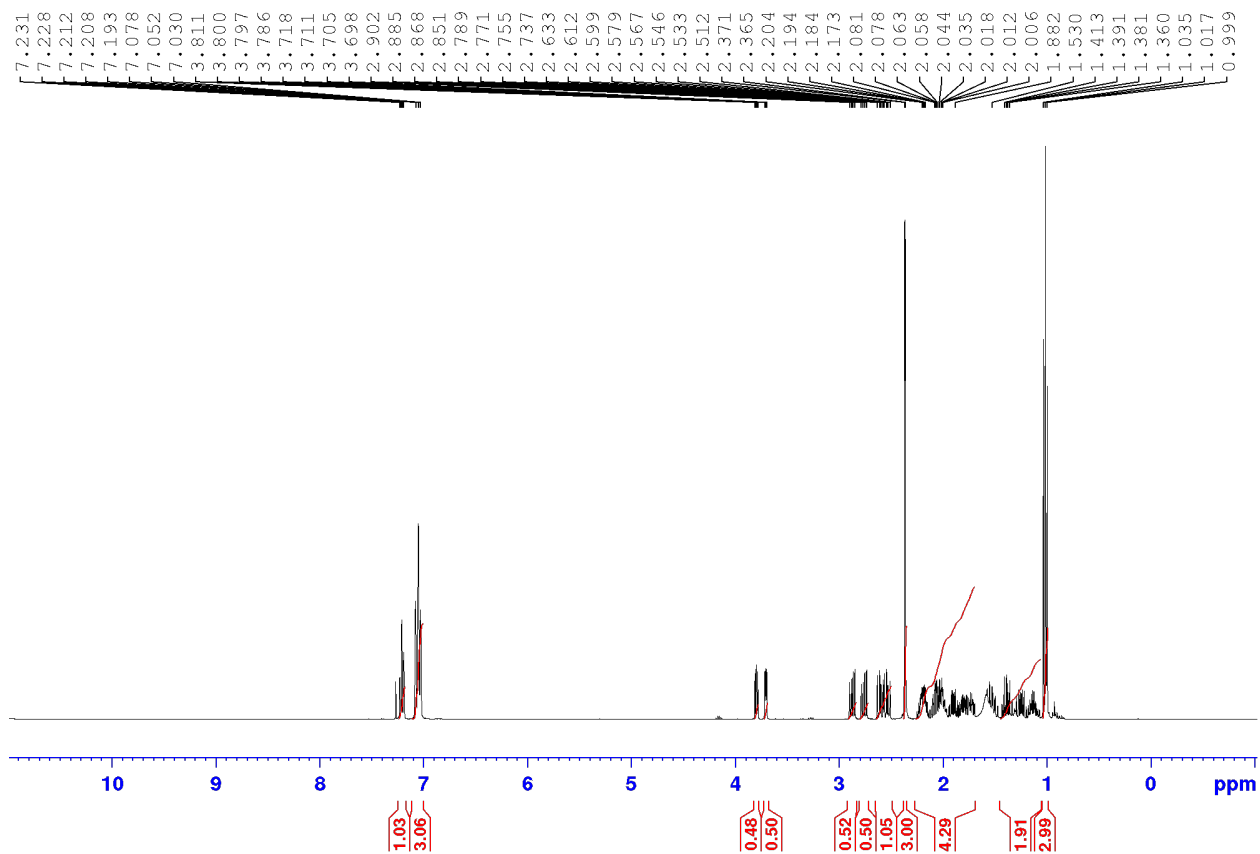

**Figure S25.**  $^1\text{H}$  NMR spectrum of 2-methyl-5-(3-methylbenzyl)cyclopentan-1-ol

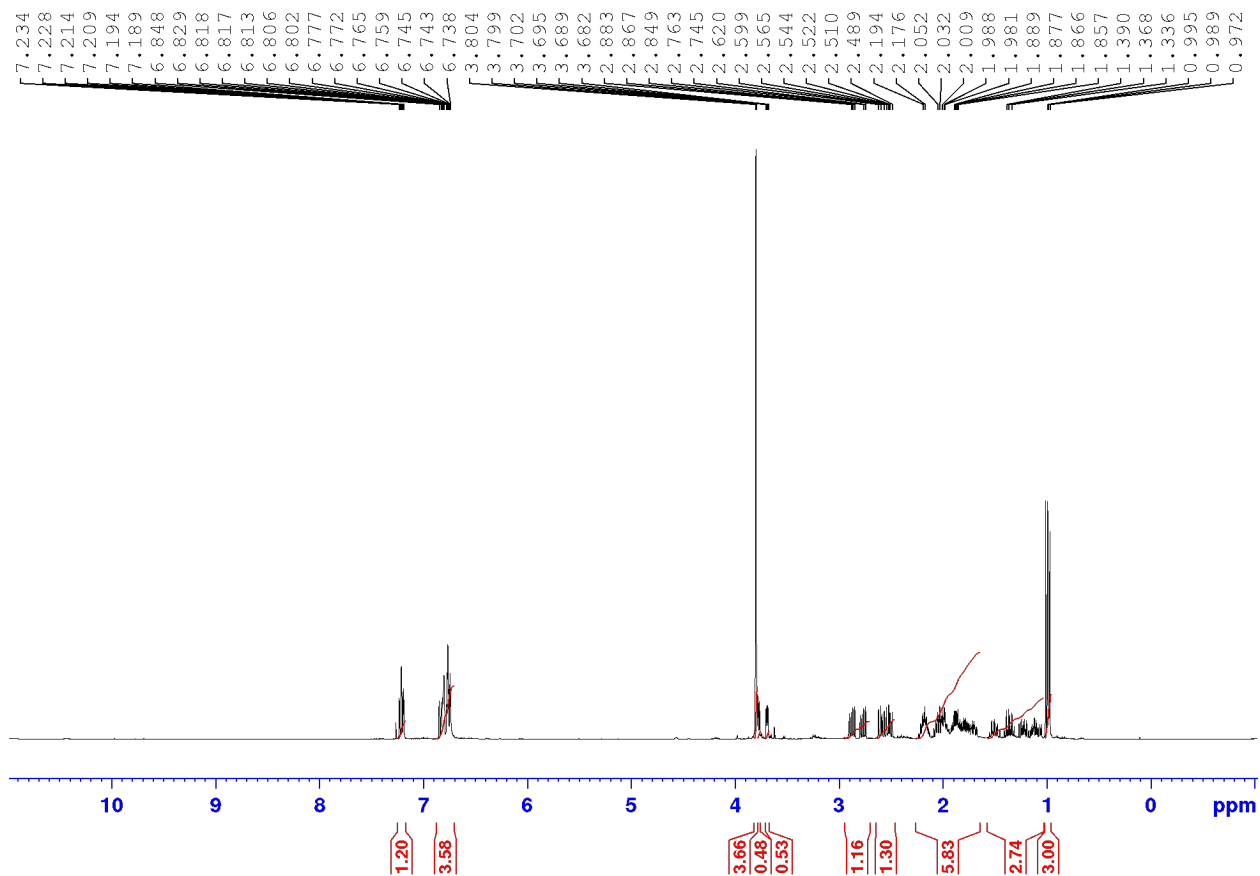

**Figure S26.**  $^1\text{H}$  NMR spectrum of 2-methyl-5-(3-methoxybenzyl)cyclopentan-1-ol

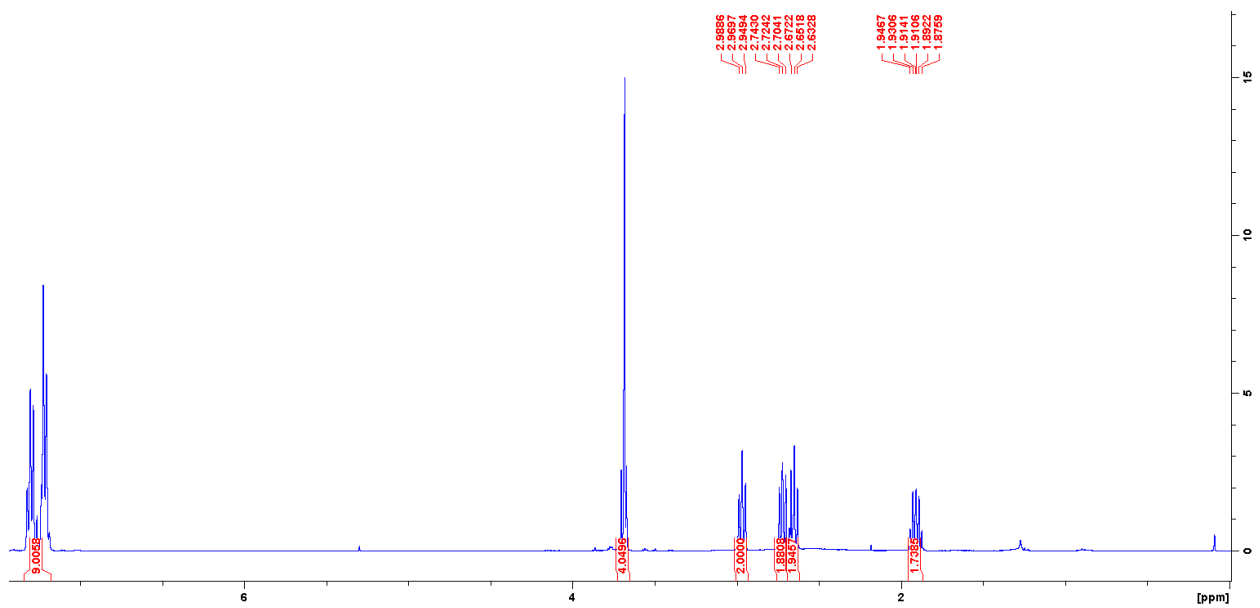

**Figure S27.**  $^1\text{H}$  NMR spectrum of 3-phenylpropan-1-ol

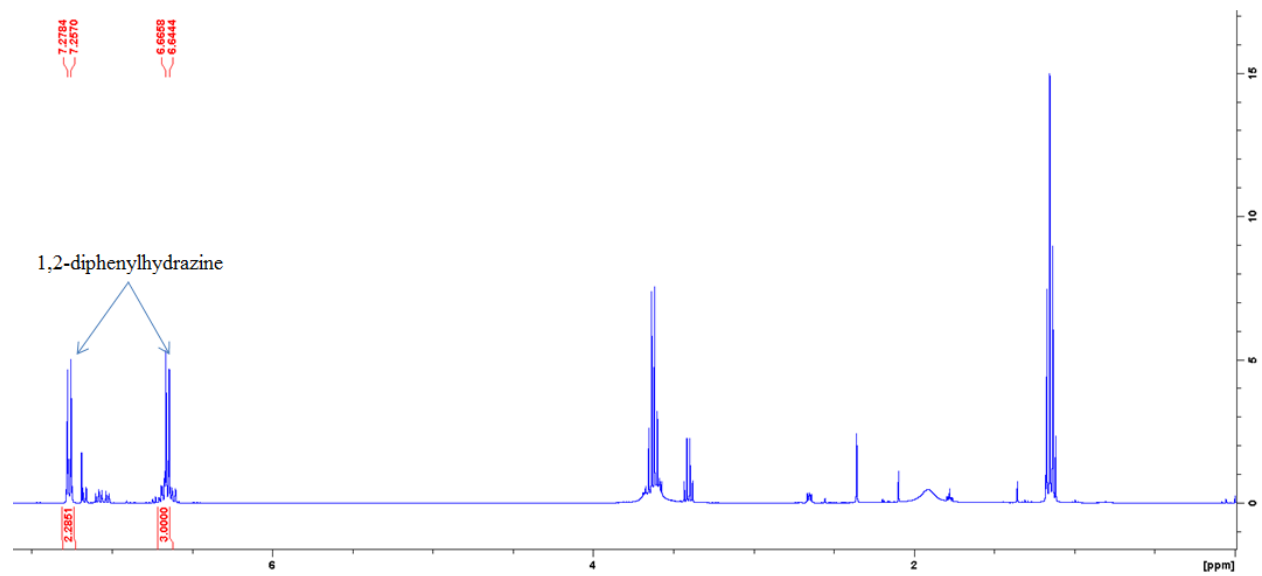

**Figure S28.** Crude  $^1\text{H}$  NMR spectrum of 1,2-diphenylhydrazine

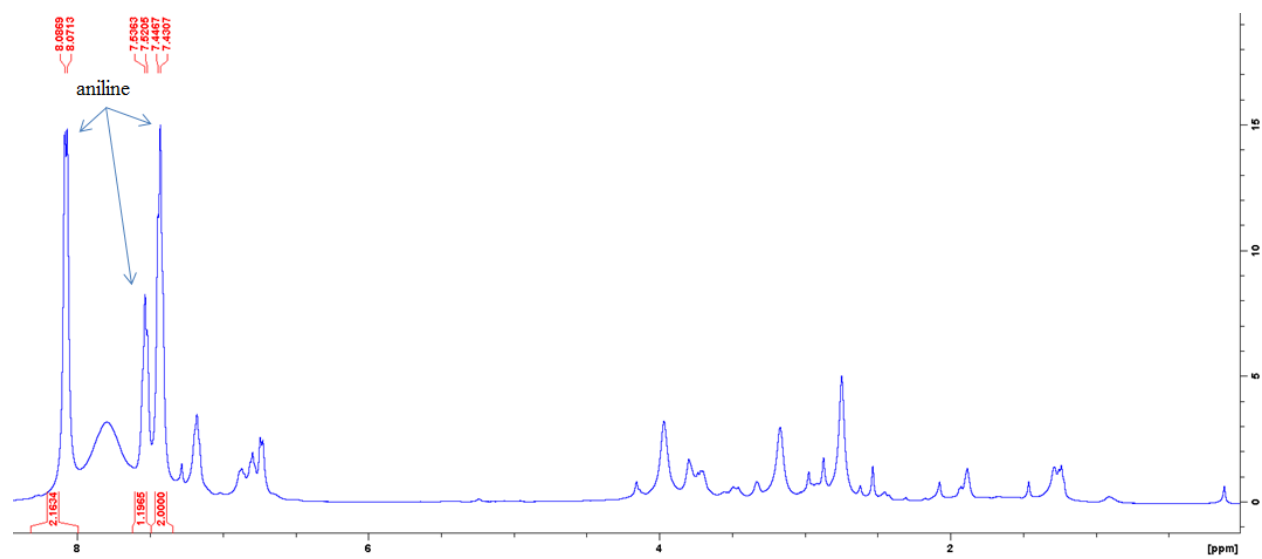

**Figure S29.** Crude  $^1\text{H}$  NMR spectrum of aniline



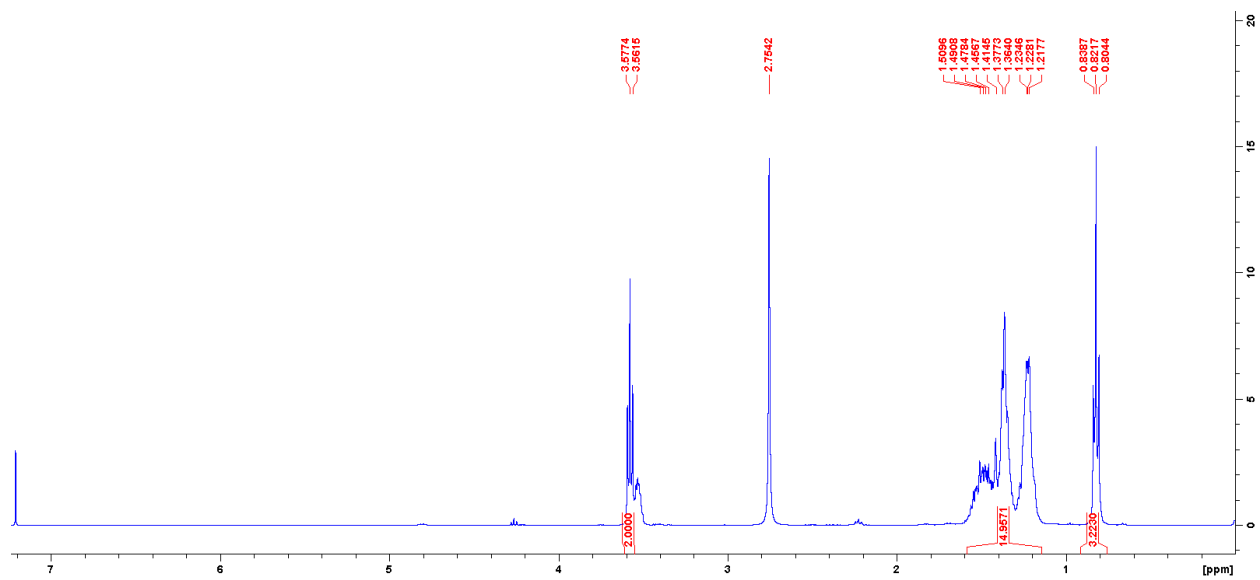

**Figure S30.**  $^1\text{H}$  NMR spectrum of decane-1,5-diol

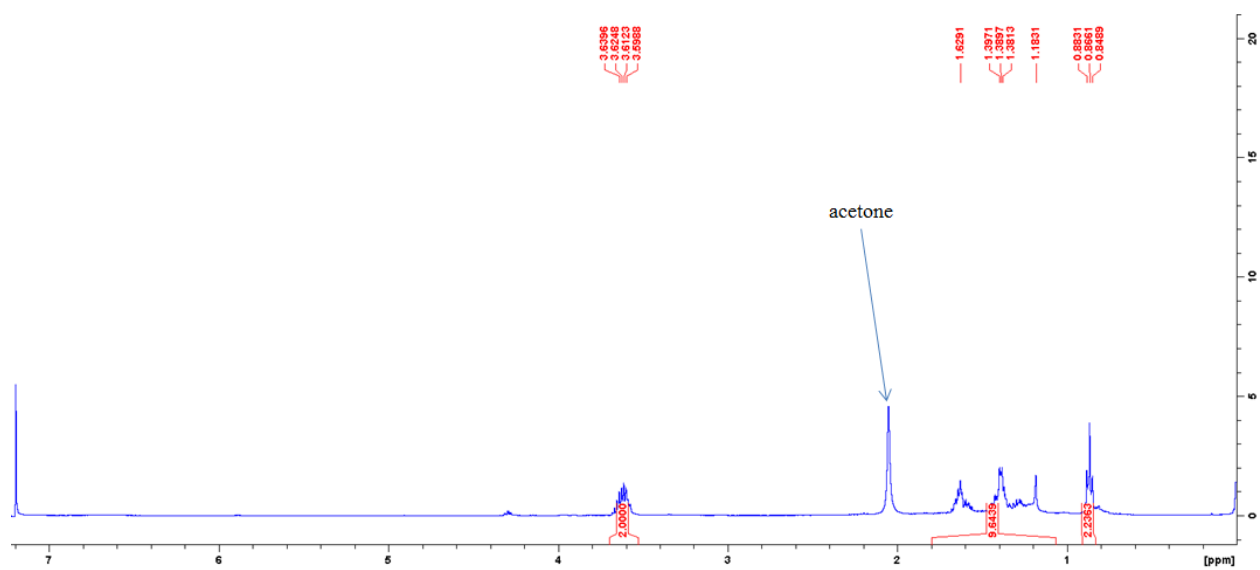

**Figure S31.** Crude  $^1\text{H}$  NMR spectrum of hexane-1,6-diol

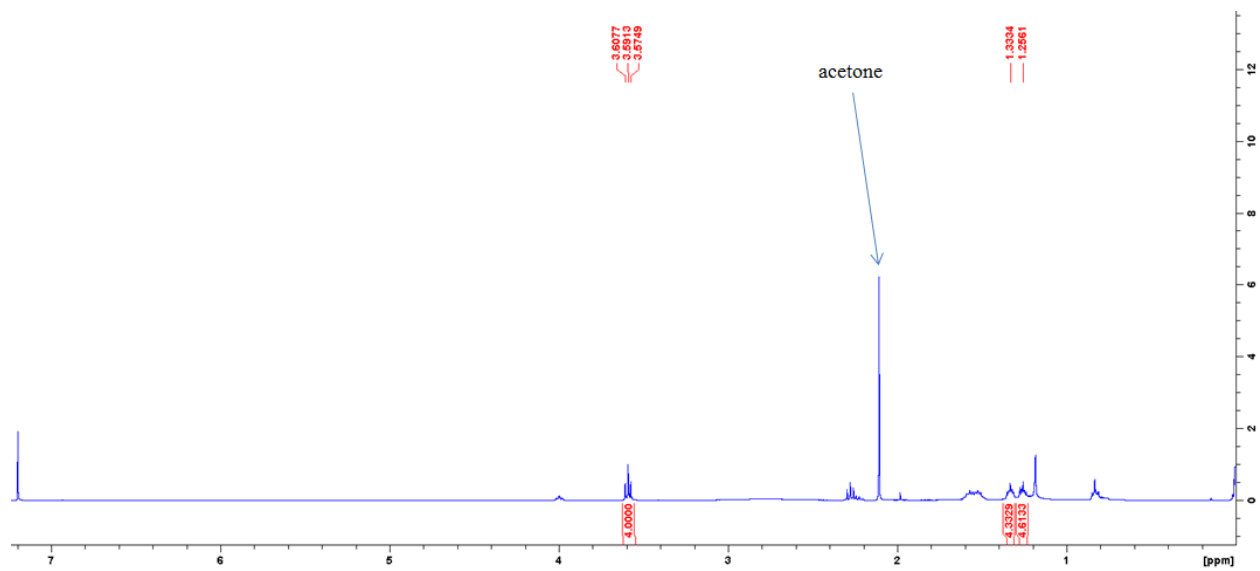

**Figure S32.** Crude  $^1\text{H}$  NMR spectrum of heptane-1,4-diol

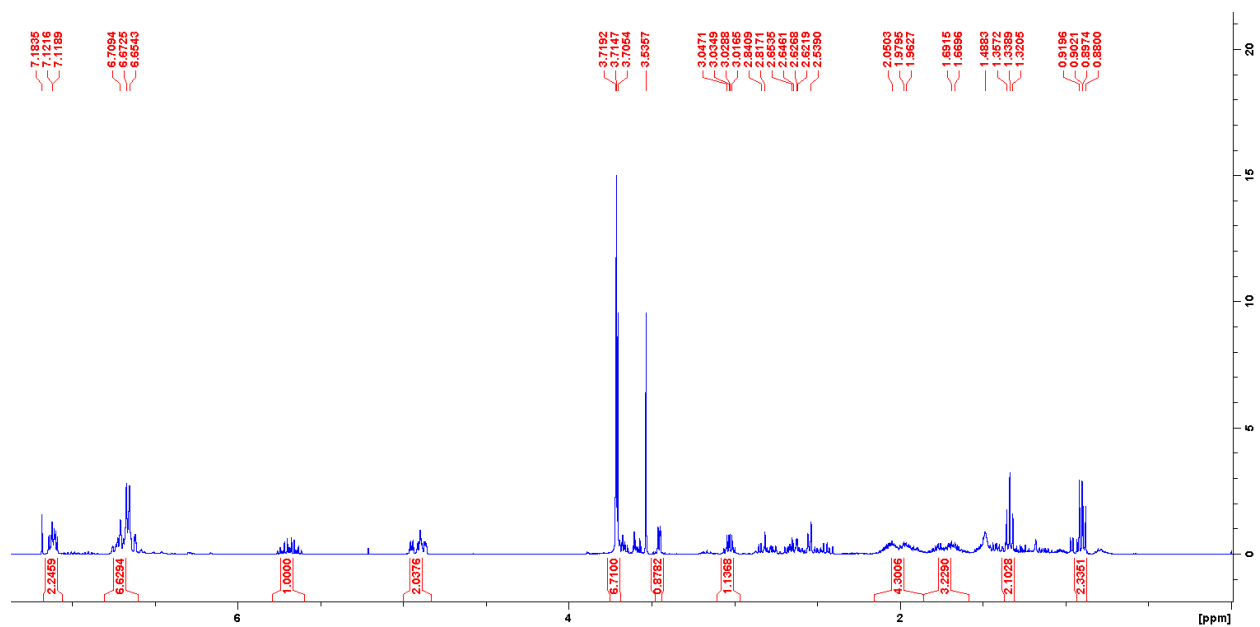

**Figure S33.**  $^1\text{H}$  NMR spectrum of the reduction of **1d** by  $\text{SmBr}_2$ -water- $\text{Et}_3\text{N}$

## 12. $^{13}\text{C}$ NMR Spectra of Products:

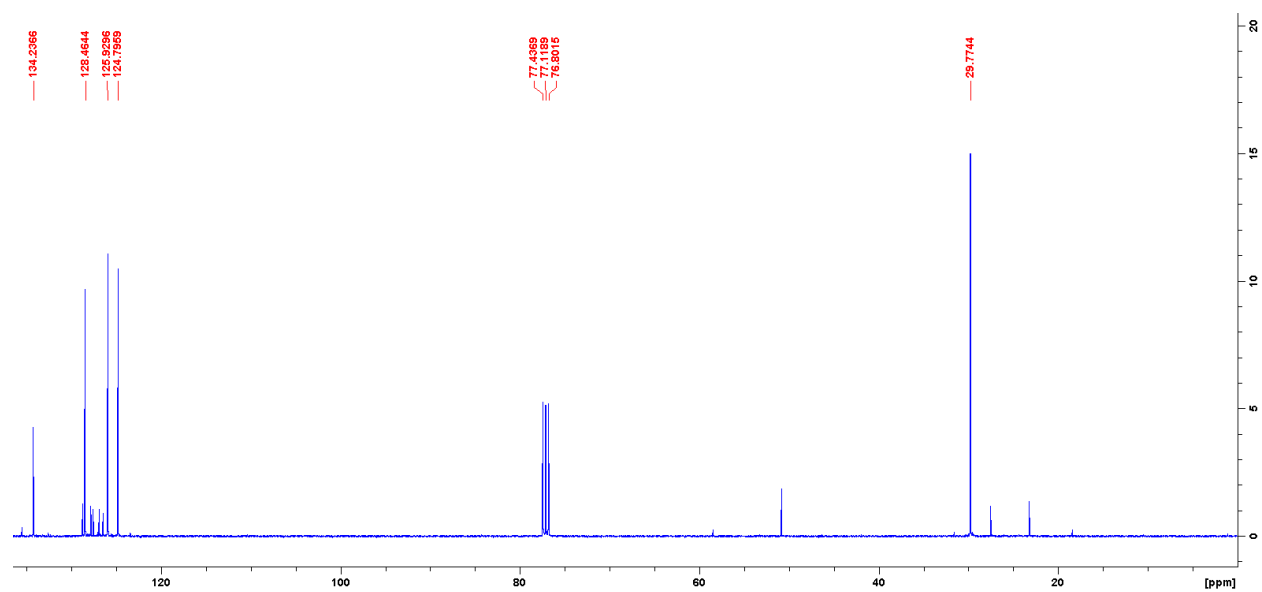

Figure S34.  $^{13}\text{C}$  NMR spectrum of 1,4-dihydronaphthalene

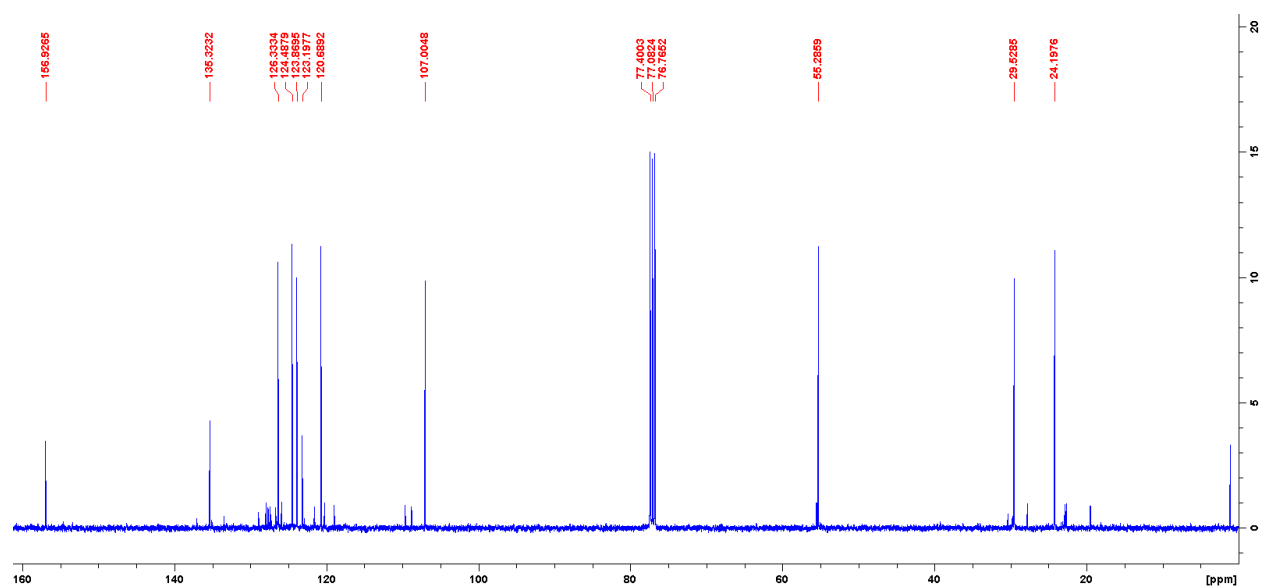

Figure S35.  $^{13}\text{C}$  NMR spectrum of 1,4-dihydro-5-methoxynaphthalene

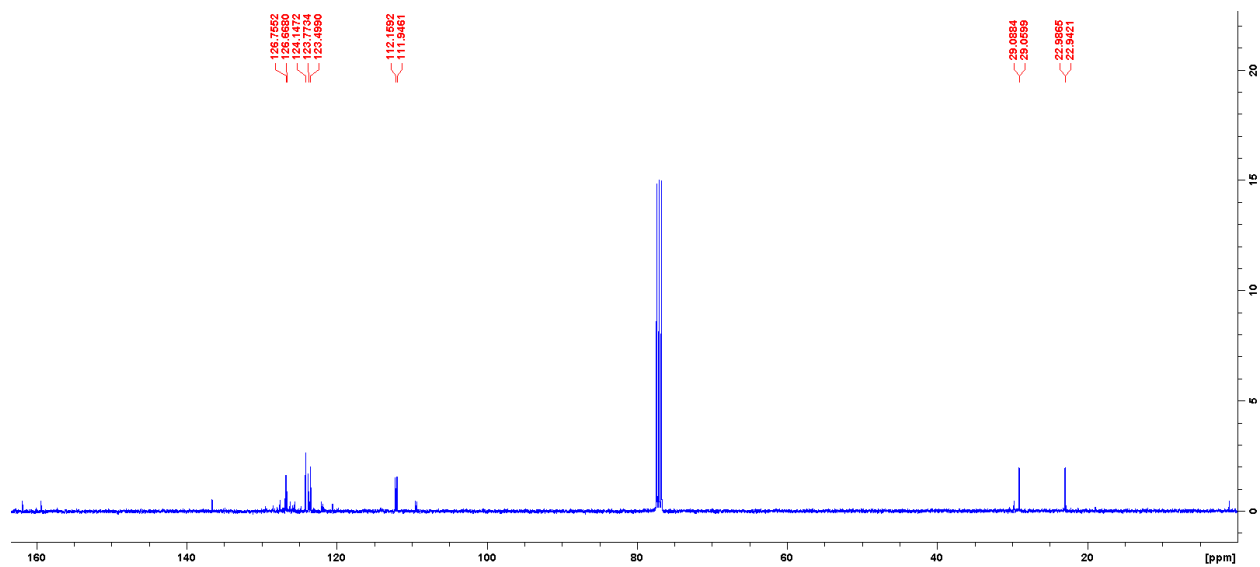

**Figure S36.**  $^{13}\text{C}$  NMR spectrum of 1,4-dihydro-5-fluoronaphthalene

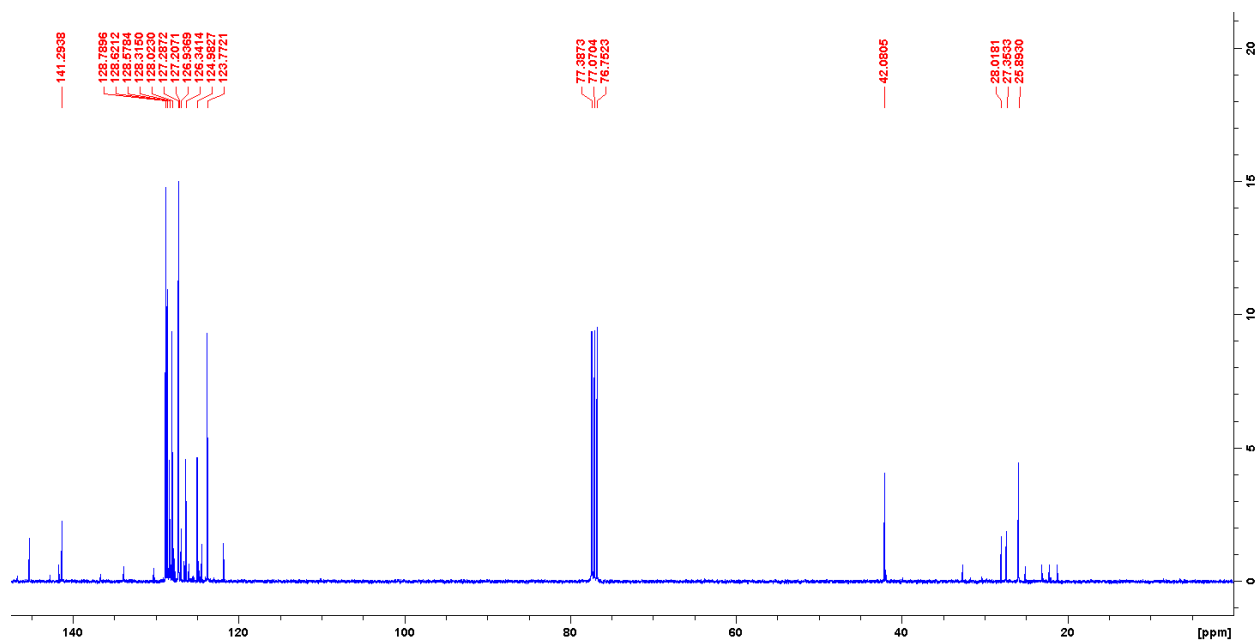

**Figure S37.**  $^{13}\text{C}$  NMR spectrum of the products of the reduction of biphenyl by  $\text{SmBr}_2\text{-NMEA}$

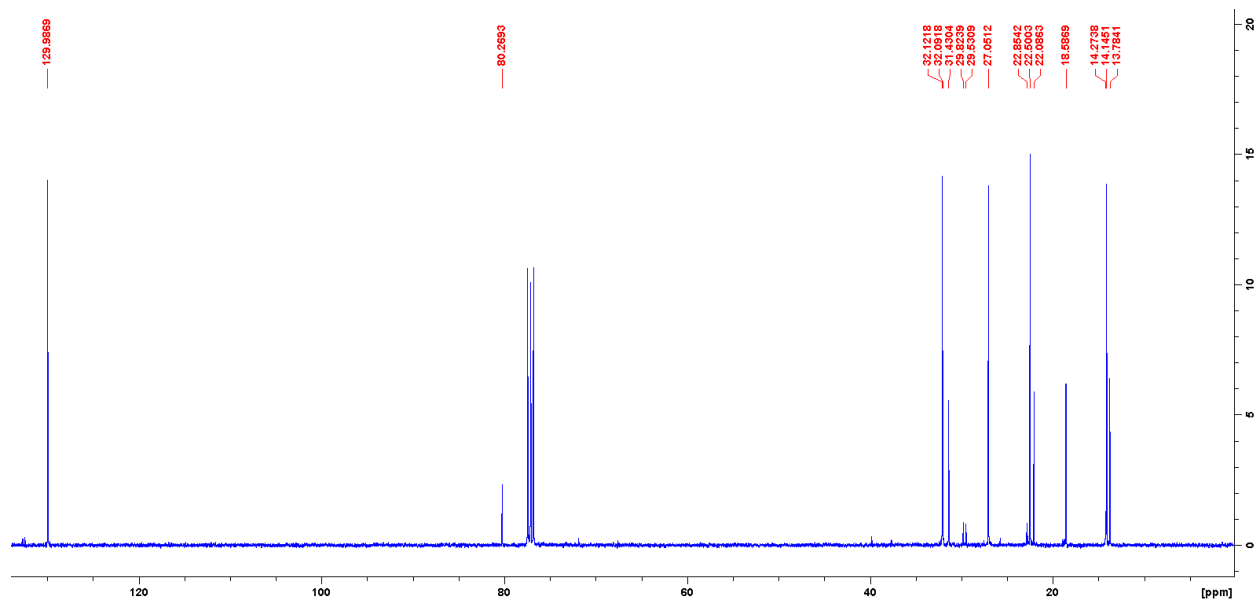

Figure S38.  $^{13}\text{C}$  NMR spectrum of *cis*-5-decene

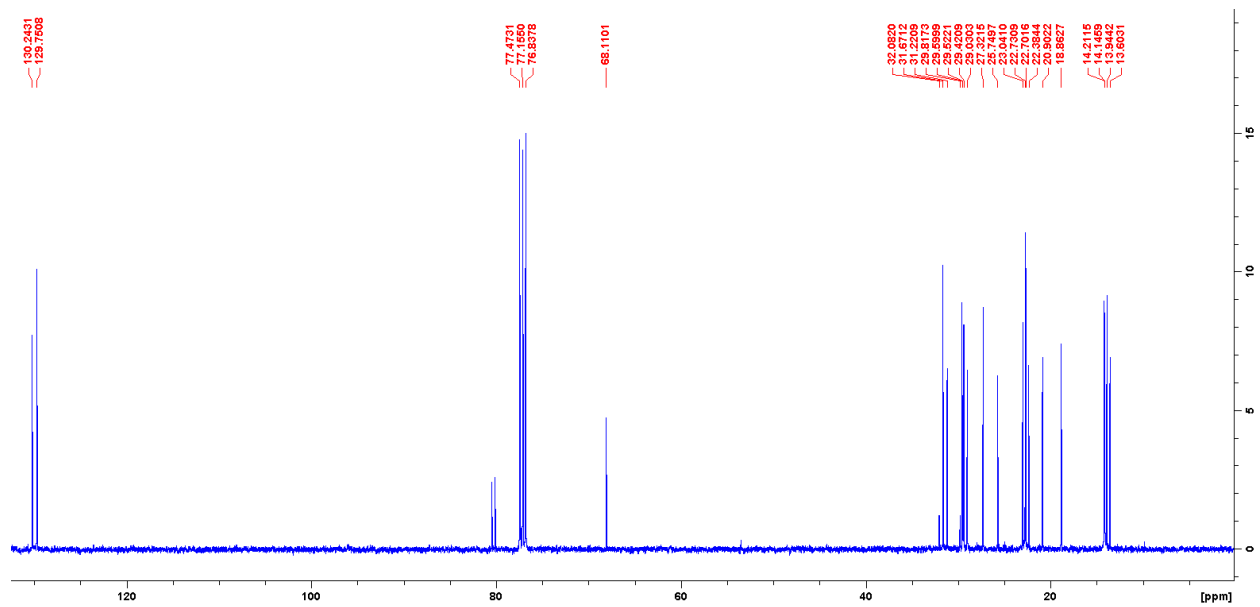

Figure S39.  $^{13}\text{C}$  NMR spectrum of *cis*-4-decene

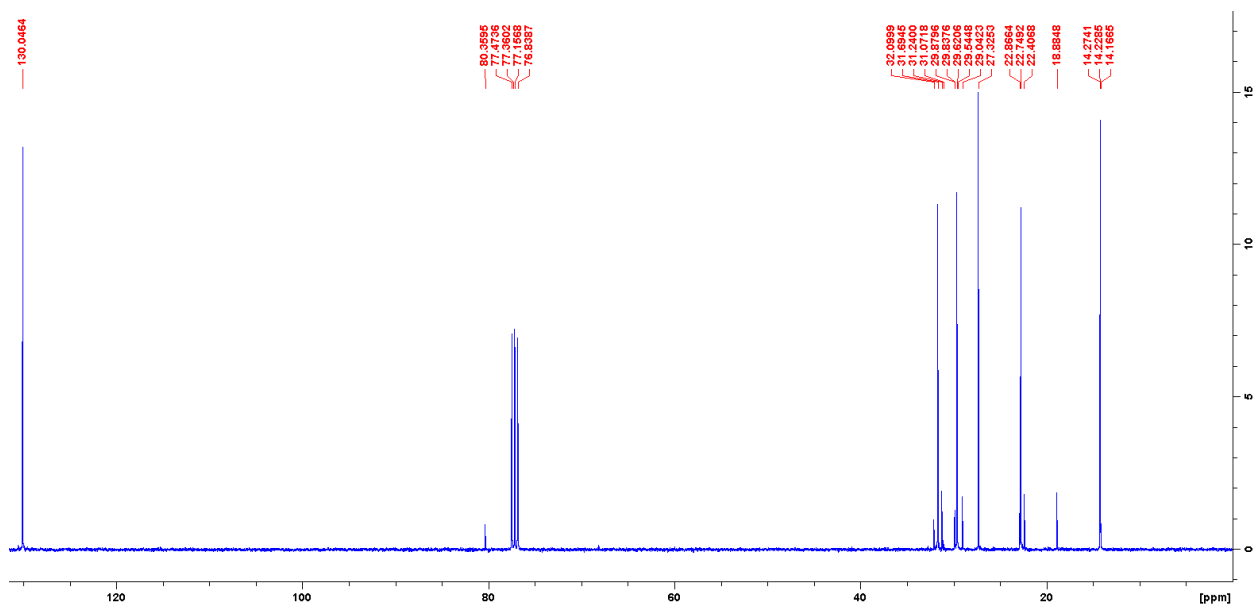

Figure S40.  $^{13}\text{C}$  NMR spectrum of *cis*-6-dodecene

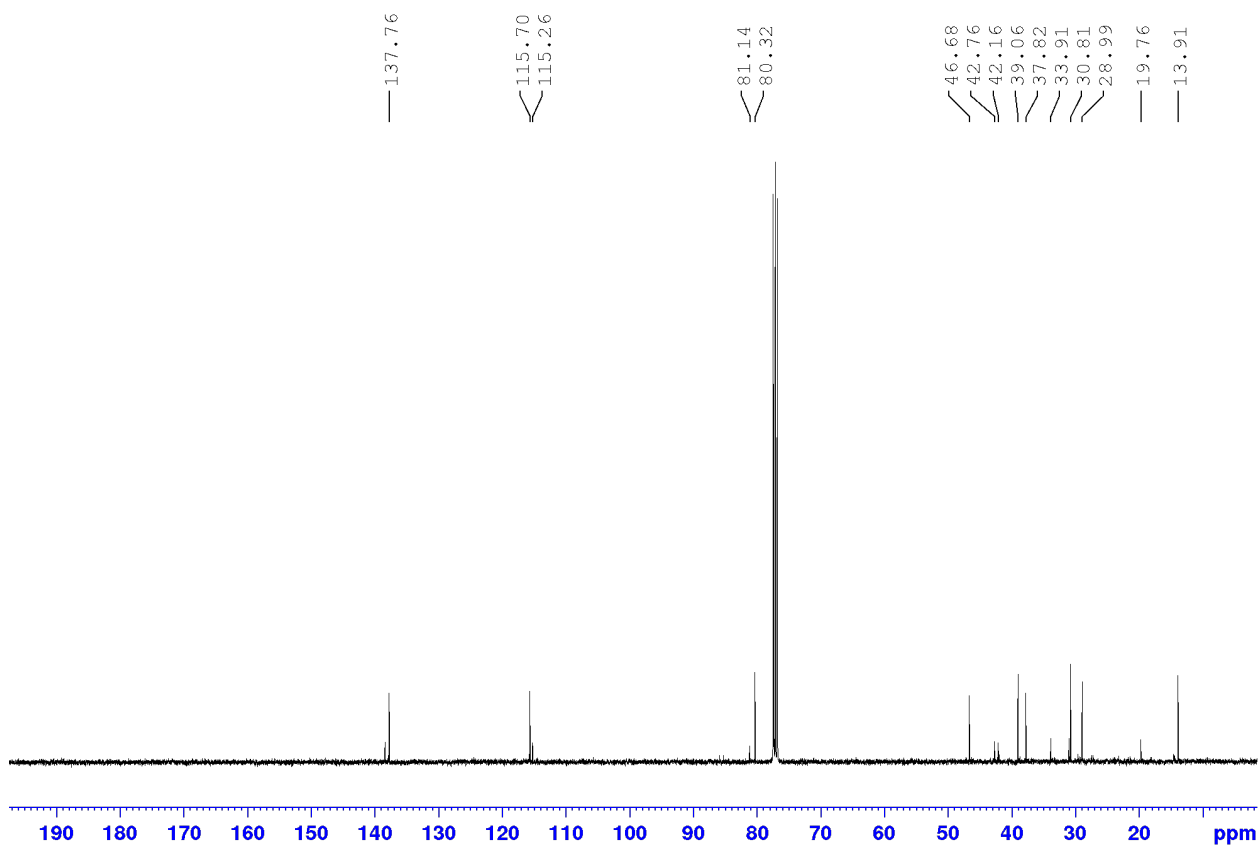

Figure S41.  $^{13}\text{C}$  NMR spectrum of 2-allyl-5-methylcyclopentan-1-ol

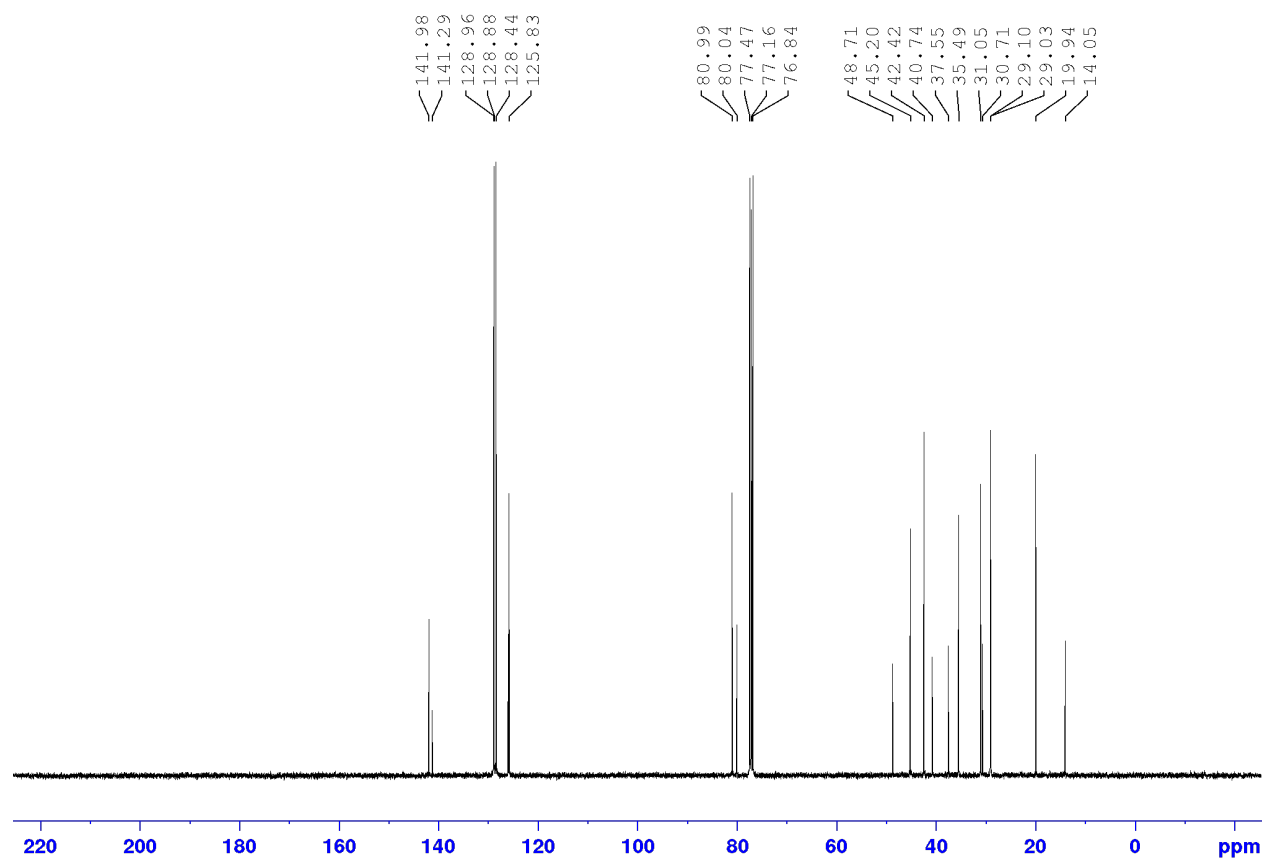

**Figure S42.**  $^{13}\text{C}$  NMR spectrum of 2-benzyl-5-methylcyclopentan-1-ol.

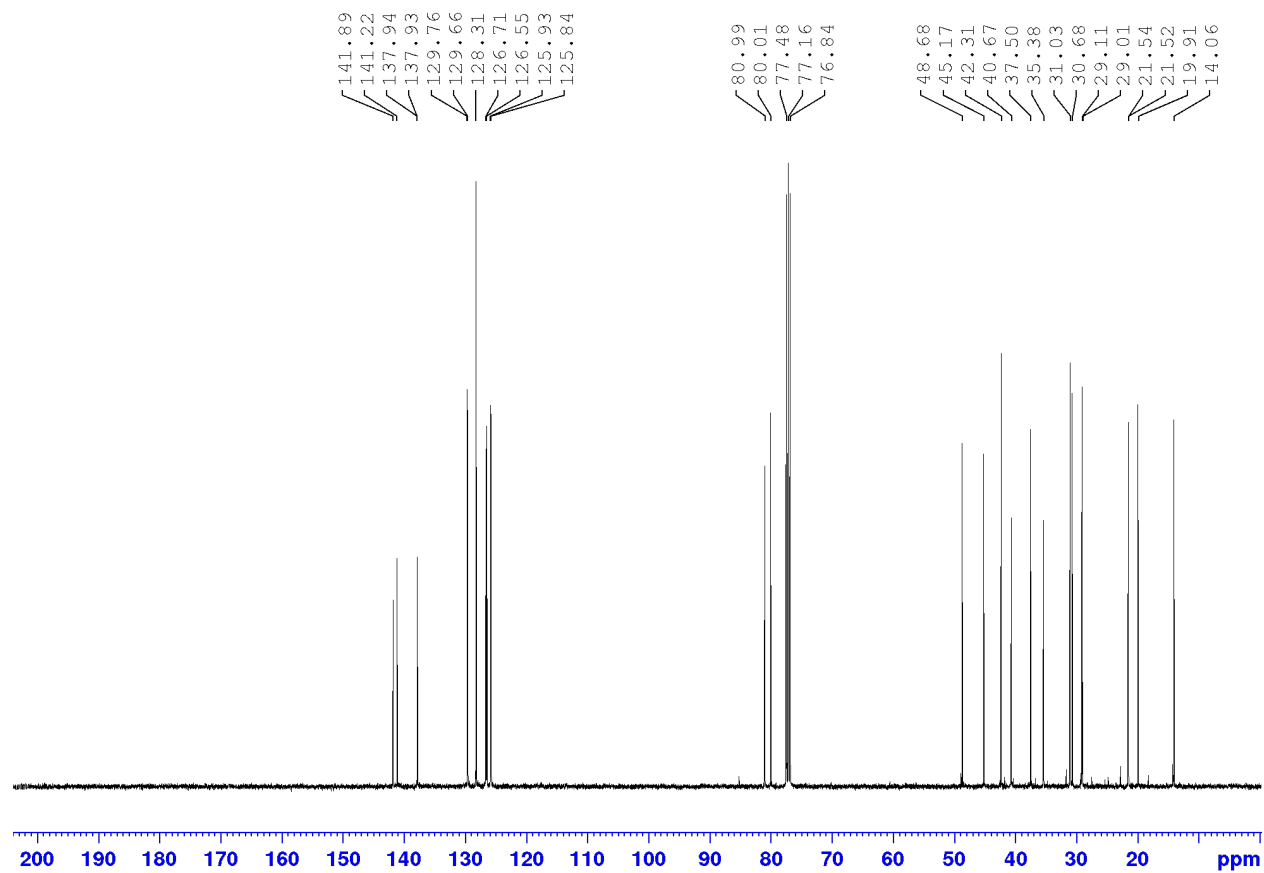

**Figure S43.**  $^{13}\text{C}$  NMR spectrum of 2-methyl-5-(3-methylbenzyl)cyclopentan-1-ol



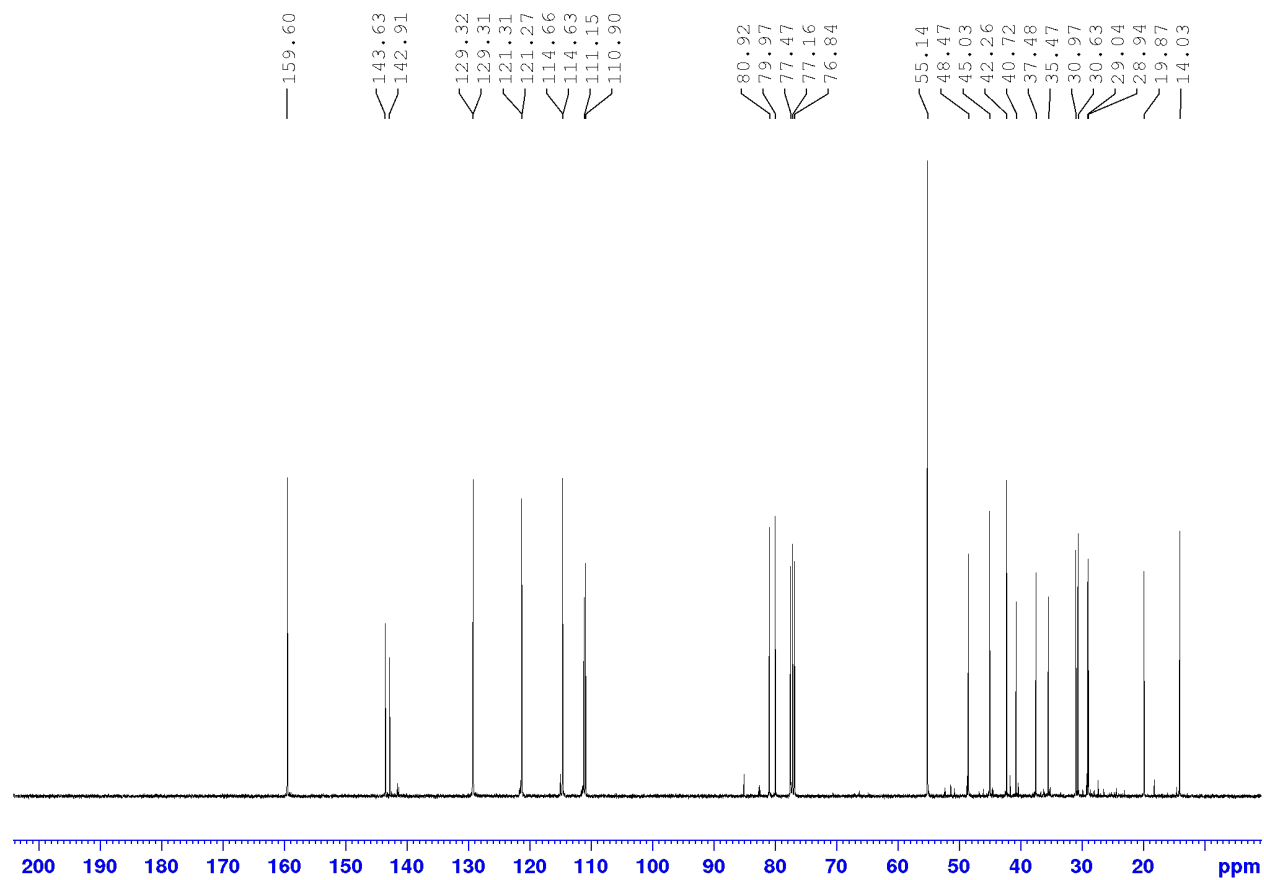

**Figure S44.**  $^{13}\text{C}$  NMR spectrum of 2-methyl-5-(3-methoxybenzyl)cyclopentan-1-ol.

## 14. Computational Details

Gaussian09 programs were used for the calculations with the APF-D hybrid DFT method and the 6-311+G(2d,p) basis set.<sup>4-7</sup> Natural-population analysis was obtained by including pop=npa.<sup>8</sup> Solvation values were calculated using the polarizable continuum model with integral equation formalism IEFPCM with tetrahydrofuran as the solvent.<sup>9,10</sup> The geometries and frequencies were calculated with the keywords uapfd/6-311+g(2d,p) opt=(calcfc,tight) int=(ultrafine,acc2e=12) pop=npa scrf=(iefpcm,solvent=thf)

**Table S3.** DFT Results for Hydrogen Atom

|               | E+ZPE     | G         | H         | S      |
|---------------|-----------|-----------|-----------|--------|
| Gas Phase     |           |           |           |        |
| Hydrogen atom | -0.502246 | -0.512900 | -0.499886 | 27.392 |
| IEFPCM(THF)   |           |           |           |        |
| Hydrogen atom | -0.502264 | -0.512918 | -0.499903 | 27.392 |

**Hydrogen atom (gas)**

```

SCF Done: E(UAPFD) = -0.502246024723
Zero-point correction= 0.000000 (Hartree/Particle)
Thermal correction to Energy= 0.001416
Thermal correction to Enthalpy= 0.002360
Thermal correction to Gibbs Free Energy= -0.010654
Sum of electronic and zero-point Energies= -0.502246
Sum of electronic and thermal Energies= -0.500830
Sum of electronic and thermal Enthalpies= -0.499886
Sum of electronic and thermal Free Energies= -0.512900
  
```

|               | E (Thermal)<br>KCal/Mol | CV<br>Cal/Mol-Kelvin | S<br>Cal/Mol-Kelvin |
|---------------|-------------------------|----------------------|---------------------|
| Total         | 0.889                   | 2.981                | 27.392              |
| Electronic    | 0.000                   | 0.000                | 1.377               |
| Translational | 0.889                   | 2.981                | 26.014              |
| Rotational    | 0.000                   | 0.000                | 0.000               |
| Vibrational   | 0.000                   | 0.000                | 0.000               |

Charge = 0 Multiplicity = 2 Standard orientation

| Center<br>Number | Atomic<br>Number | Atomic<br>Type | Coordinates (Angstroms) |          |          |
|------------------|------------------|----------------|-------------------------|----------|----------|
|                  |                  |                | X                       | Y        | Z        |
| 1                | 1                | 0              | 0.000000                | 0.000000 | 0.000000 |

**Hydrogen atom (iefpcm, thf)**

```

SCF Done: E(UAPFD) = -0.502263907129
Zero-point correction= 0.000000 (Hartree/Particle)
Thermal correction to Energy= 0.001416
Thermal correction to Enthalpy= 0.002360
Thermal correction to Gibbs Free Energy= -0.010654
Sum of electronic and zero-point Energies= -0.502264
Sum of electronic and thermal Energies= -0.500848
Sum of electronic and thermal Enthalpies= -0.499903
Sum of electronic and thermal Free Energies= -0.512918
  
```

|       | E (Thermal)<br>KCal/Mol | CV<br>Cal/Mol-Kelvin | S<br>Cal/Mol-Kelvin |
|-------|-------------------------|----------------------|---------------------|
| Total | 0.889                   | 2.981                | 27.392              |

|               |       |       |        |
|---------------|-------|-------|--------|
| Electronic    | 0.000 | 0.000 | 1.377  |
| Translational | 0.889 | 2.981 | 26.014 |
| Rotational    | 0.000 | 0.000 | 0.000  |
| Vibrational   | 0.000 | 0.000 | 0.000  |

Charge = 0 Multiplicity = 2 Standard orientation

| Center<br>Number | Atomic<br>Number | Atomic<br>Type | Coordinates (Angstroms) |          |          |
|------------------|------------------|----------------|-------------------------|----------|----------|
|                  |                  |                | X                       | Y        | Z        |
| 1                | 1                | 0              | 0.000000                | 0.000000 | 0.000000 |

**Table S4. DFT Results for N-Methylethanolamine and Associated Radical**

**NMEA (gas)**

SCF Done: E(UAPFD) = -249.557496353  
 Zero-point correction= 0.125431 (Hartree/Particle)  
 Thermal correction to Energy= 0.132273  
 Thermal correction to Enthalpy= 0.133217  
 Thermal correction to Gibbs Free Energy= 0.095148  
 Sum of electronic and zero-point Energies= -249.439551  
 Sum of electronic and thermal Energies= -249.432709  
 Sum of electronic and thermal Enthalpies= -249.431765  
 Sum of electronic and thermal Free Energies= -249.469834

|               | E (Thermal)<br>KCal/Mol | CV<br>Cal/Mol-Kelvin | S<br>Cal/Mol-Kelvin |
|---------------|-------------------------|----------------------|---------------------|
| Total         | 83.003                  | 22.601               | 80.124              |
| Electronic    | 0.000                   | 0.000                | 0.000               |
| Translational | 0.889                   | 2.981                | 38.863              |
| Rotational    | 0.889                   | 2.981                | 25.833              |
| Vibrational   | 81.225                  | 16.639               | 15.427              |

Charge = 0 Multiplicity = 1 Standard orientation:

| Center<br>Number | Atomic<br>Number | Atomic<br>Type | Coordinates (Angstroms) |           |           |
|------------------|------------------|----------------|-------------------------|-----------|-----------|
|                  |                  |                | X                       | Y         | Z         |
| 1                | 7                | 0              | -0.883651               | -0.390455 | 0.290124  |
| 2                | 1                | 0              | -0.833169               | -0.414963 | 1.288549  |
| 3                | 6                | 0              | -0.065034               | 0.721241  | -0.214752 |
| 4                | 1                | 0              | -0.119051               | 0.747463  | -1.283066 |
| 5                | 1                | 0              | -0.431973               | 1.644012  | 0.183681  |
| 6                | 6                | 0              | 1.398423                | 0.520032  | 0.220458  |
| 7                | 1                | 0              | 2.008633                | 1.282426  | -0.216918 |
| 8                | 1                | 0              | 1.464626                | 0.578231  | 1.286821  |
| 9                | 6                | 0              | -2.280587               | -0.198392 | -0.125303 |
| 10               | 1                | 0              | -2.334346               | -0.170231 | -1.193581 |
| 11               | 1                | 0              | -2.876100               | -1.008588 | 0.240549  |
| 12               | 1                | 0              | -2.648132               | 0.723443  | 0.274736  |
| 13               | 8                | 0              | 1.853355                | -0.763486 | -0.216027 |
| 14               | 1                | 0              | 2.811421                | -0.797999 | -0.165846 |

**NMEA (iefpcm, thf)**

SCF Done: E(UAPFD) = -249.565908209  
 Zero-point correction= 0.125645 (Hartree/Particle)  
 Thermal correction to Energy= 0.132399  
 Thermal correction to Enthalpy= 0.133343  
 Thermal correction to Gibbs Free Energy= 0.095576  
 Sum of electronic and zero-point Energies= -249.447108  
 Sum of electronic and thermal Energies= -249.440354  
 Sum of electronic and thermal Enthalpies= -249.439410  
 Sum of electronic and thermal Free Energies= -249.477178

|            | E (Thermal)<br>KCal/Mol | CV<br>Cal/Mol-Kelvin | S<br>Cal/Mol-Kelvin |
|------------|-------------------------|----------------------|---------------------|
| Total      | 83.082                  | 22.484               | 79.488              |
| Electronic | 0.000                   | 0.000                | 0.000               |

Translational 0.889 2.981 38.863  
 Rotational 0.889 2.981 25.842  
 Vibrational 81.304 16.522 14.783

Charge = 0 Multiplicity = 1 Standard orientation:

| Center Number | Atomic Number | Atomic Type | Coordinates (Angstroms) |           |           |
|---------------|---------------|-------------|-------------------------|-----------|-----------|
|               |               |             | X                       | Y         | Z         |
| 1             | 7             | 0           | -0.883651               | -0.390455 | 0.290124  |
| 2             | 1             | 0           | -0.833169               | -0.414963 | 1.288549  |
| 3             | 6             | 0           | -0.065034               | 0.721241  | -0.214752 |
| 4             | 1             | 0           | -0.119051               | 0.747463  | -1.283066 |
| 5             | 1             | 0           | -0.431973               | 1.644012  | 0.183681  |
| 6             | 6             | 0           | 1.398423                | 0.520032  | 0.220458  |
| 7             | 1             | 0           | 2.008633                | 1.282426  | -0.216918 |
| 8             | 1             | 0           | 1.464626                | 0.578231  | 1.286821  |
| 9             | 6             | 0           | -2.280587               | -0.198392 | -0.125303 |
| 10            | 1             | 0           | -2.334346               | -0.170231 | -1.193581 |
| 11            | 1             | 0           | -2.876100               | -1.008588 | 0.240549  |
| 12            | 1             | 0           | -2.648132               | 0.723443  | 0.274736  |
| 13            | 8             | 0           | 1.853355                | -0.763486 | -0.216027 |
| 14            | 1             | 0           | 2.811421                | -0.797999 | -0.165846 |

**NMEA O-Oxidized Radical (gas)**

SCF Done: E(UAPFD) = -248.884458230  
 Zero-point correction= 0.111618 (Hartree/Par\$)  
 Thermal correction to Energy= 0.117922  
 Thermal correction to Enthalpy= 0.118866  
 Thermal correction to Gibbs Free Energy= 0.081361  
 Sum of electronic and zero-point Energies= -248.783203  
 Sum of electronic and thermal Energies= -248.776899  
 Sum of electronic and thermal Enthalpies= -248.775955  
 Sum of electronic and thermal Free Energies= -248.813460

|               | E (Thermal)<br>KCal/Mol | CV<br>Cal/Mol-Kelvin | S<br>Cal/Mol-Kelvin |
|---------------|-------------------------|----------------------|---------------------|
| Total         | 73.997                  | 21.160               | 78.935              |
| Electronic    | 0.000                   | 0.000                | 1.377               |
| Translational | 0.889                   | 2.981                | 38.823              |
| Rotational    | 0.889                   | 2.981                | 25.725              |
| Vibrational   | 72.220                  | 15.199               | 13.010              |

Charge = 0 Multiplicity = 2 Standard orientation:

| Center Number | Atomic Number | Atomic Type | Coordinates (Angstroms) |           |           |
|---------------|---------------|-------------|-------------------------|-----------|-----------|
|               |               |             | X                       | Y         | Z         |
| 1             | 7             | 0           | -0.824315               | -0.392514 | 0.284019  |
| 2             | 1             | 0           | -0.769546               | -0.434113 | 1.281651  |
| 3             | 6             | 0           | 0.021209                | 0.704799  | -0.207807 |
| 4             | 1             | 0           | -0.037394               | 0.749310  | -1.275273 |
| 5             | 1             | 0           | -0.318946               | 1.630619  | 0.206985  |
| 6             | 6             | 0           | 1.480909                | 0.457815  | 0.216310  |
| 7             | 1             | 0           | 2.109102                | 1.210483  | -0.212367 |
| 8             | 1             | 0           | 1.553941                | 0.497391  | 1.283081  |
| 9             | 6             | 0           | -2.217665               | -0.156756 | -0.120820 |
| 10            | 1             | 0           | -2.275959               | -0.110314 | -1.188221 |
| 11            | 1             | 0           | -2.832798               | -0.956466 | 0.235515  |
| 12            | 1             | 0           | -2.558443               | 0.768118  | 0.295566  |
| 13            | 8             | 0           | 1.899191                | -0.830323 | -0.242646 |

**NMEA O-Oxidized Radical (iefpcm, thf)**

SCF Done: E(UAPFD) = -248.891641012  
 Zero-point correction= 0.111461 (Hartree/Par\$)  
 Thermal correction to Energy= 0.117789  
 Thermal correction to Enthalpy= 0.118733  
 Thermal correction to Gibbs Free Energy= 0.081269  
 Sum of electronic and zero-point Energies= -248.790005

Sum of electronic and thermal Energies= -248.783677  
 Sum of electronic and thermal Enthalpies= -248.782733  
 Sum of electronic and thermal Free Energies= -248.820197

|               | E (Thermal)<br>KCal/Mol | CV<br>Cal/Mol-Kelvin | S<br>Cal/Mol-Kelvin |
|---------------|-------------------------|----------------------|---------------------|
| Total         | 73.914                  | 21.328               | 78.850              |
| Electronic    | 0.000                   | 0.000                | 1.377               |
| Translational | 0.889                   | 2.981                | 38.823              |
| Rotational    | 0.889                   | 2.981                | 25.725              |
| Vibrational   | 72.136                  | 15.367               | 12.925              |

Charge = 0 Multiplicity = 2 Standard orientation:

| Center<br>Number | Atomic<br>Number | Atomic<br>Type | Coordinates (Angstroms) |           |           |
|------------------|------------------|----------------|-------------------------|-----------|-----------|
|                  |                  |                | X                       | Y         | Z         |
| 1                | 7                | 0              | -0.824315               | -0.392514 | 0.284019  |
| 2                | 1                | 0              | -0.769546               | -0.434113 | 1.281651  |
| 3                | 6                | 0              | 0.021209                | 0.704799  | -0.207807 |
| 4                | 1                | 0              | -0.037394               | 0.749310  | -1.275273 |
| 5                | 1                | 0              | -0.318946               | 1.630619  | 0.206985  |
| 6                | 6                | 0              | 1.480909                | 0.457815  | 0.216310  |
| 7                | 1                | 0              | 2.109102                | 1.210483  | -0.212367 |
| 8                | 1                | 0              | 1.553941                | 0.497391  | 1.283081  |
| 9                | 6                | 0              | -2.217665               | -0.156756 | -0.120820 |
| 10               | 1                | 0              | -2.275959               | -0.110314 | -1.188221 |
| 11               | 1                | 0              | -2.832798               | -0.956466 | 0.235515  |
| 12               | 1                | 0              | -2.558443               | 0.768118  | 0.295566  |
| 13               | 8                | 0              | 1.899191                | -0.830323 | -0.242646 |

**Table S5.** DFT Results for *trans*-Stilbene and Associated Radical

**Trans stilbene (gas)**

SCF Done: E(UAPFD) = -540.392686521  
 Zero-point correction= 0.214889 (Hartree/Particle)  
 Thermal correction to Energy= 0.226211  
 Thermal correction to Enthalpy= 0.227155  
 Thermal correction to Gibbs Free Energy= 0.175248  
 Sum of electronic and zero-point Energies= -540.177797  
 Sum of electronic and thermal Energies= -540.166476  
 Sum of electronic and thermal Enthalpies= -540.165532  
 Sum of electronic and thermal Free Energies= -540.217439

|               | E (Thermal)<br>KCal/Mol | CV<br>Cal/Mol-Kelvin | S<br>Cal/Mol-Kelvin |
|---------------|-------------------------|----------------------|---------------------|
| Total         | 141.949                 | 44.550               | 109.247             |
| Electronic    | 0.000                   | 0.000                | 0.000               |
| Translational | 0.889                   | 2.981                | 41.472              |
| Rotational    | 0.889                   | 2.981                | 31.883              |
| Vibrational   | 140.172                 | 38.588               | 35.892              |

Charge = 0 Multiplicity = 1 Standard orientation

| Center<br>Number | Atomic<br>Number | Atomic<br>Type | Coordinates (Angstroms) |           |           |
|------------------|------------------|----------------|-------------------------|-----------|-----------|
|                  |                  |                | X                       | Y         | Z         |
| 1                | 6                | 0              | 0.490315                | 0.456729  | -0.011896 |
| 2                | 1                | 0              | 0.222897                | 1.511117  | 0.010382  |
| 3                | 6                | 0              | -0.490322               | -0.456766 | -0.012165 |
| 4                | 1                | 0              | -0.222928               | -1.511172 | 0.009562  |
| 5                | 6                | 0              | 1.924332                | 0.192462  | -0.012496 |
| 6                | 6                | 0              | 2.806347                | 1.262664  | 0.174415  |
| 7                | 6                | 0              | 2.471352                | -1.084611 | -0.194201 |
| 8                | 6                | 0              | 4.179888                | 1.068340  | 0.194215  |
| 9                | 1                | 0              | 2.401735                | 2.261595  | 0.310947  |
| 10               | 6                | 0              | 3.841491                | -1.280125 | -0.174318 |
| 11               | 1                | 0              | 1.817218                | -1.933106 | -0.364018 |
| 12               | 6                | 0              | 4.704610                | -0.205460 | 0.021901  |

|    |   |   |           |           |           |
|----|---|---|-----------|-----------|-----------|
| 13 | 1 | 0 | 4.842475  | 1.914897  | 0.343673  |
| 14 | 1 | 0 | 4.243650  | -2.277904 | -0.319178 |
| 15 | 1 | 0 | 5.778193  | -0.362239 | 0.034319  |
| 16 | 6 | 0 | -1.924338 | -0.192480 | -0.012654 |
| 17 | 6 | 0 | -2.806352 | -1.262665 | 0.174360  |
| 18 | 6 | 0 | -2.471350 | 1.084593  | -0.194372 |
| 19 | 6 | 0 | -4.179886 | -1.068312 | 0.194309  |
| 20 | 1 | 0 | -2.401742 | -2.261600 | 0.310876  |
| 21 | 6 | 0 | -3.841484 | 1.280135  | -0.174344 |
| 22 | 1 | 0 | -1.817215 | 1.933054  | -0.364360 |
| 23 | 6 | 0 | -4.704601 | 0.205496  | 0.022018  |
| 24 | 1 | 0 | -4.842475 | -1.914851 | 0.343858  |
| 25 | 1 | 0 | -4.243642 | 2.277912  | -0.319227 |
| 26 | 1 | 0 | -5.778180 | 0.362294  | 0.034542  |

**Trans stilbene (iefpcm,thf)**

SCF Done: E(UAPFD) = -540.397938661  
 Zero-point correction= 0.214930 (Hartree/Particle)  
 Thermal correction to Energy= 0.226262  
 Thermal correction to Enthalpy= 0.227206  
 Thermal correction to Gibbs Free Energy= 0.174764  
 Sum of electronic and zero-point Energies= -540.183009  
 Sum of electronic and thermal Energies= -540.171677  
 Sum of electronic and thermal Enthalpies= -540.170732  
 Sum of electronic and thermal Free Energies= -540.223175

|               | E (Thermal)<br>KCal/Mol | CV<br>Cal/Mol-Kelvin | S<br>Cal/Mol-Kelvin |
|---------------|-------------------------|----------------------|---------------------|
| Total         | 141.982                 | 44.503               | 110.375             |
| Electronic    | 0.000                   | 0.000                | 0.000               |
| Translational | 0.889                   | 2.981                | 41.472              |
| Rotational    | 0.889                   | 2.981                | 31.886              |
| Vibrational   | 140.204                 | 38.541               | 37.017              |

Charge = 0 Multiplicity = 1 Standard orientation

| Center<br>Number | Atomic<br>Number | Atomic<br>Type | Coordinates (Angstroms) |           |           |
|------------------|------------------|----------------|-------------------------|-----------|-----------|
|                  |                  |                | X                       | Y         | Z         |
| 1                | 6                | 0              | 0.491806                | 0.455933  | 0.000030  |
| 2                | 1                | 0              | 0.230205                | 1.511896  | 0.000022  |
| 3                | 6                | 0              | -0.491797               | -0.455877 | 0.000018  |
| 4                | 1                | 0              | -0.230181               | -1.511837 | -0.000013 |
| 5                | 6                | 0              | 1.926149                | 0.188122  | 0.000020  |
| 6                | 6                | 0              | 2.810423                | 1.274009  | -0.000152 |
| 7                | 6                | 0              | 2.471385                | -1.103767 | 0.000177  |
| 8                | 6                | 0              | 4.185514                | 1.082586  | -0.000180 |
| 9                | 1                | 0              | 2.407493                | 2.282842  | -0.000269 |
| 10               | 6                | 0              | 3.842983                | -1.295685 | 0.000150  |
| 11               | 1                | 0              | 1.817460                | -1.969172 | 0.000335  |
| 12               | 6                | 0              | 4.709033                | -0.204214 | -0.000031 |
| 13               | 1                | 0              | 4.849438                | 1.941219  | -0.000318 |
| 14               | 1                | 0              | 4.243467                | -2.304583 | 0.000277  |
| 15               | 1                | 0              | 5.782992                | -0.359134 | -0.000050 |
| 16               | 6                | 0              | -1.926144               | -0.188093 | 0.000014  |
| 17               | 6                | 0              | -2.810391               | -1.274002 | -0.000154 |
| 18               | 6                | 0              | -2.471416               | 1.103781  | 0.000171  |
| 19               | 6                | 0              | -4.185487               | -1.082617 | -0.000177 |
| 20               | 1                | 0              | -2.407435               | -2.282825 | -0.000272 |
| 21               | 6                | 0              | -3.843018               | 1.295662  | 0.000149  |
| 22               | 1                | 0              | -1.817517               | 1.969206  | 0.000319  |
| 23               | 6                | 0              | -4.709040               | 0.204169  | -0.000027 |
| 24               | 1                | 0              | -4.849387               | -1.941268 | -0.000311 |
| 25               | 1                | 0              | -4.243529               | 2.304550  | 0.000274  |
| 26               | 1                | 0              | -5.783003               | 0.359061  | -0.000042 |

**Trans stilbene radical (gas)**

SCF Done: E(UAPFD) = -540.969963709  
 Zero-point correction= 0.225003 (Hartree/Particle)

Thermal correction to Energy= 0.236512  
 Thermal correction to Enthalpy= 0.237456  
 Thermal correction to Gibbs Free Energy= 0.184607  
 Sum of electronic and zero-point Energies= -540.744960  
 Sum of electronic and thermal Energies= -540.733452  
 Sum of electronic and thermal Enthalpies= -540.732508  
 Sum of electronic and thermal Free Energies= -540.785356

|               | E (Thermal)<br>KCal/Mol | CV<br>Cal/Mol-Kelvin | S<br>Cal/Mol-Kelvin |
|---------------|-------------------------|----------------------|---------------------|
| Total         | 148.414                 | 45.966               | 111.230             |
| Electronic    | 0.000                   | 0.000                | 1.377               |
| Translational | 0.889                   | 2.981                | 41.488              |
| Rotational    | 0.889                   | 2.981                | 31.810              |
| Vibrational   | 146.636                 | 40.005               | 36.554              |

Charge = 0 Multiplicity = 2 Standard orientation

| Center<br>Number | Atomic<br>Number | Atomic<br>Type | Coordinates (Angstroms) |           |           |
|------------------|------------------|----------------|-------------------------|-----------|-----------|
|                  |                  |                | X                       | Y         | Z         |
| 1                | 6                | 0              | -0.635468               | -1.411954 | -0.666081 |
| 2                | 1                | 0              | -0.304523               | -1.150337 | -1.676801 |
| 3                | 6                | 0              | 0.501566                | -1.348807 | 0.295094  |
| 4                | 1                | 0              | 0.370530                | -1.871308 | 1.239098  |
| 5                | 6                | 0              | -1.789030               | -0.510590 | -0.272547 |
| 6                | 6                | 0              | -3.094266               | -0.993015 | -0.248793 |
| 7                | 6                | 0              | -1.562338               | 0.824373  | 0.061196  |
| 8                | 6                | 0              | -4.154619               | -0.160858 | 0.091056  |
| 9                | 1                | 0              | -3.284075               | -2.033031 | -0.500019 |
| 10               | 6                | 0              | -2.618790               | 1.658858  | 0.397617  |
| 11               | 1                | 0              | -0.546491               | 1.207756  | 0.063718  |
| 12               | 6                | 0              | -3.919976               | 1.168905  | 0.413823  |
| 13               | 1                | 0              | -5.166189               | -0.554526 | 0.105912  |
| 14               | 1                | 0              | -2.425576               | 2.696094  | 0.653048  |
| 15               | 1                | 0              | -4.745822               | 1.820264  | 0.681037  |
| 16               | 6                | 0              | 1.684883                | -0.606522 | 0.125570  |
| 17               | 6                | 0              | 2.673804                | -0.616909 | 1.143882  |
| 18               | 6                | 0              | 1.950609                | 0.179946  | -1.024578 |
| 19               | 6                | 0              | 3.842760                | 0.102695  | 1.016852  |
| 20               | 1                | 0              | 2.493825                | -1.208322 | 2.036878  |
| 21               | 6                | 0              | 3.124604                | 0.897657  | -1.140989 |
| 22               | 1                | 0              | 1.218672                | 0.226182  | -1.823453 |
| 23               | 6                | 0              | 4.081299                | 0.867344  | -0.126776 |
| 24               | 1                | 0              | 4.580982                | 0.075172  | 1.812330  |
| 25               | 1                | 0              | 3.301720                | 1.493145  | -2.031349 |
| 26               | 1                | 0              | 5.000940                | 1.434119  | -0.224797 |
| 27               | 1                | 0              | -1.004214               | -2.441953 | -0.727552 |

**Trans stilbene radical (iefpcm.thf)**

SCF Done: E(UAPFD) = -540.974539180  
 Zero-point correction= 0.224935 (Hartree/Particle)  
 Thermal correction to Energy= 0.236464  
 Thermal correction to Enthalpy= 0.237408  
 Thermal correction to Gibbs Free Energy= 0.184077  
 Sum of electronic and zero-point Energies= -540.749605  
 Sum of electronic and thermal Energies= -540.738075  
 Sum of electronic and thermal Enthalpies= -540.737131  
 Sum of electronic and thermal Free Energies= -540.790462

|               | E (Thermal)<br>KCal/Mol | CV<br>Cal/Mol-Kelvin | S<br>Cal/Mol-Kelvin |
|---------------|-------------------------|----------------------|---------------------|
| Total         | 148.383                 | 45.958               | 112.245             |
| Electronic    | 0.000                   | 0.000                | 1.377               |
| Translational | 0.889                   | 2.981                | 41.488              |
| Rotational    | 0.889                   | 2.981                | 31.823              |
| Vibrational   | 146.606                 | 39.996               | 37.556              |

Charge = 0 Multiplicity = 2 Standard orientation

| Center | Atomic | Atomic | Coordinates (Angstroms) |  |  |
|--------|--------|--------|-------------------------|--|--|
|--------|--------|--------|-------------------------|--|--|

| Number | Number | Type | X         | Y         | Z         |
|--------|--------|------|-----------|-----------|-----------|
| 1      | 6      | 0    | -0.631721 | -1.338191 | -0.799262 |
| 2      | 1      | 0    | -0.287405 | -0.991402 | -1.778327 |
| 3      | 6      | 0    | 0.482669  | -1.336819 | 0.191247  |
| 4      | 1      | 0    | 0.320735  | -1.905046 | 1.103709  |
| 5      | 6      | 0    | -1.793690 | -0.478923 | -0.344049 |
| 6      | 6      | 0    | -3.068501 | -1.017197 | -0.191853 |
| 7      | 6      | 0    | -1.599931 | 0.874701  | -0.064388 |
| 8      | 6      | 0    | -4.132118 | -0.221579 | 0.222886  |
| 9      | 1      | 0    | -3.232301 | -2.070625 | -0.401321 |
| 10     | 6      | 0    | -2.659040 | 1.672704  | 0.345727  |
| 11     | 1      | 0    | -0.606879 | 1.302850  | -0.165106 |
| 12     | 6      | 0    | -3.930930 | 1.126306  | 0.491515  |
| 13     | 1      | 0    | -5.119650 | -0.657941 | 0.336660  |
| 14     | 1      | 0    | -2.492197 | 2.724662  | 0.555739  |
| 15     | 1      | 0    | -4.758931 | 1.748712  | 0.815293  |
| 16     | 6      | 0    | 1.679530  | -0.602495 | 0.091053  |
| 17     | 6      | 0    | 2.633980  | -0.670669 | 1.141038  |
| 18     | 6      | 0    | 1.995585  | 0.226346  | -1.016753 |
| 19     | 6      | 0    | 3.817260  | 0.036149  | 1.083182  |
| 20     | 1      | 0    | 2.416031  | -1.295513 | 2.002330  |
| 21     | 6      | 0    | 3.183666  | 0.930269  | -1.063865 |
| 22     | 1      | 0    | 1.295057  | 0.314677  | -1.839762 |
| 23     | 6      | 0    | 4.105377  | 0.844294  | -0.019587 |
| 24     | 1      | 0    | 4.527513  | -0.035586 | 1.901148  |
| 25     | 1      | 0    | 3.399512  | 1.558182  | -1.922906 |
| 26     | 1      | 0    | 5.035615  | 1.400591  | -0.063185 |
| 27     | 1      | 0    | -0.989919 | -2.362945 | -0.945630 |

**Table S6. DFT Results for Naphthalene and Associated Radical**

**Naphthalene (gas)**

SCF Done: E(UAPFD) = -385.666386714  
Zero-point correction= 0.147444 (Hartree/Particle)  
Thermal correction to Energy= 0.154288  
Thermal correction to Enthalpy= 0.155232  
Thermal correction to Gibbs Free Energy= 0.117518  
Sum of electronic and zero-point Energies= -385.518943  
Sum of electronic and thermal Energies= -385.512099  
Sum of electronic and thermal Enthalpies= -385.511155  
Sum of electronic and thermal Free Energies= -385.548869

|               | E (Thermal)<br>KCal/Mol | CV<br>Cal/Mol-Kelvin | S<br>Cal/Mol-Kelvin |
|---------------|-------------------------|----------------------|---------------------|
| Total         | 96.817                  | 28.905               | 79.375              |
| Electronic    | 0.000                   | 0.000                | 0.000               |
| Translational | 0.889                   | 2.981                | 40.455              |
| Rotational    | 0.889                   | 2.981                | 26.158              |
| Vibrational   | 95.039                  | 22.943               | 12.762              |

Charge = 0 Multiplicity = 1 Standard orientation

| Center<br>Number | Atomic<br>Number | Atomic<br>Type | Coordinates (Angstroms) |           |           |
|------------------|------------------|----------------|-------------------------|-----------|-----------|
|                  |                  |                | X                       | Y         | Z         |
| 1                | 6                | 0              | 0.000000                | -2.419990 | 0.705452  |
| 2                | 6                | 0              | 0.000000                | -1.237328 | 1.396292  |
| 3                | 6                | 0              | 0.000000                | 0.000000  | 0.712084  |
| 4                | 6                | 0              | 0.000000                | 0.000000  | -0.712084 |
| 5                | 6                | 0              | 0.000000                | -1.237328 | -1.396292 |
| 6                | 6                | 0              | 0.000000                | -2.419990 | -0.705452 |
| 7                | 1                | 0              | 0.000000                | 1.234133  | 2.482481  |
| 8                | 1                | 0              | 0.000000                | -3.363547 | 1.241649  |
| 9                | 1                | 0              | 0.000000                | -1.234133 | 2.482481  |
| 10               | 6                | 0              | 0.000000                | 1.237328  | 1.396292  |
| 11               | 6                | 0              | 0.000000                | 1.237328  | -1.396292 |
| 12               | 1                | 0              | 0.000000                | -1.234133 | -2.482481 |
| 13               | 1                | 0              | 0.000000                | -3.363547 | -1.241649 |



|    |   |   |          |          |           |
|----|---|---|----------|----------|-----------|
| 14 | 6 | 0 | 0.000000 | 2.419990 | -0.705452 |
| 15 | 6 | 0 | 0.000000 | 2.419990 | 0.705452  |
| 16 | 1 | 0 | 0.000000 | 1.234133 | -2.482481 |
| 17 | 1 | 0 | 0.000000 | 3.363547 | -1.241649 |
| 18 | 1 | 0 | 0.000000 | 3.363547 | 1.241649  |

**Napthalene (iefpcm, thf)**

SCF Done: E(UAPFD) = -385.669898554  
 Zero-point correction= 0.147479 (Hartree/Particle)  
 Thermal correction to Energy= 0.154320  
 Thermal correction to Enthalpy= 0.155265  
 Thermal correction to Gibbs Free Energy= 0.117543  
 Sum of electronic and zero-point Energies= -385.522420  
 Sum of electronic and thermal Energies= -385.515578  
 Sum of electronic and thermal Enthalpies= -385.514634  
 Sum of electronic and thermal Free Energies= -385.552356

|               | E (Thermal)<br>KCal/Mol | CV<br>Cal/Mol-Kelvin | S<br>Cal/Mol-Kelvin |
|---------------|-------------------------|----------------------|---------------------|
| Total         | 96.837                  | 28.865               | 79.393              |
| Electronic    | 0.000                   | 0.000                | 0.000               |
| Translational | 0.889                   | 2.981                | 40.455              |
| Rotational    | 0.889                   | 2.981                | 26.161              |
| Vibrational   | 95.060                  | 22.904               | 12.776              |

Charge = 0 Multiplicity = 1 Standard orientation

| Center<br>Number | Atomic<br>Number | Atomic<br>Type | Coordinates (Angstroms) |           |           |
|------------------|------------------|----------------|-------------------------|-----------|-----------|
|                  |                  |                | X                       | Y         | Z         |
| 1                | 6                | 0              | 0.000000                | 2.420972  | 0.705947  |
| 2                | 6                | 0              | 0.000000                | 1.237842  | 1.397714  |
| 3                | 6                | 0              | 0.000000                | 0.000000  | 0.712458  |
| 4                | 6                | 0              | 0.000000                | 0.000000  | -0.712458 |
| 5                | 6                | 0              | 0.000000                | 1.237842  | -1.397714 |
| 6                | 6                | 0              | 0.000000                | 2.420972  | -0.705947 |
| 7                | 1                | 0              | 0.000000                | -1.234739 | 2.483879  |
| 8                | 1                | 0              | 0.000000                | 3.364748  | 1.241770  |
| 9                | 1                | 0              | 0.000000                | 1.234739  | 2.483879  |
| 10               | 6                | 0              | 0.000000                | -1.237842 | 1.397714  |
| 11               | 6                | 0              | 0.000000                | -1.237842 | -1.397714 |
| 12               | 1                | 0              | 0.000000                | 1.234739  | -2.483879 |
| 13               | 1                | 0              | 0.000000                | 3.364748  | -1.241770 |
| 14               | 6                | 0              | 0.000000                | -2.420972 | -0.705947 |
| 15               | 6                | 0              | 0.000000                | -2.420972 | 0.705947  |
| 16               | 1                | 0              | 0.000000                | -1.234739 | -2.483879 |
| 17               | 1                | 0              | 0.000000                | -3.364748 | -1.241770 |
| 18               | 1                | 0              | 0.000000                | -3.364748 | 1.241770  |

**Napthalene radical (gas)**

SCF Done: E(UAPFD) = -386.227060580  
 Zero-point correction= 0.156314 (Hartree/Particle)  
 Thermal correction to Energy= 0.163833  
 Thermal correction to Enthalpy= 0.164777  
 Thermal correction to Gibbs Free Energy= 0.123508  
 Sum of electronic and zero-point Energies= -386.070747  
 Sum of electronic and thermal Energies= -386.063227  
 Sum of electronic and thermal Enthalpies= -386.062283  
 Sum of electronic and thermal Free Energies= -386.103553

|               | E (Thermal)<br>KCal/Mol | CV<br>Cal/Mol-Kelvin | S<br>Cal/Mol-Kelvin |
|---------------|-------------------------|----------------------|---------------------|
| Total         | 102.807                 | 31.012               | 86.859              |
| Electronic    | 0.000                   | 0.000                | 1.377               |
| Translational | 0.889                   | 2.981                | 40.479              |
| Rotational    | 0.889                   | 2.981                | 29.012              |
| Vibrational   | 101.029                 | 25.050               | 15.990              |

Charge = 0 Multiplicity = 2 Standard orientation

| Center Number | Atomic Number | Atomic Type | Coordinates (Angstroms) |           |           |
|---------------|---------------|-------------|-------------------------|-----------|-----------|
|               |               |             | X                       | Y         | Z         |
| 1             | 6             | 0           | 2.477360                | 0.682460  | 0.000000  |
| 2             | 6             | 0           | 1.290721                | 1.388792  | -0.000001 |
| 3             | 6             | 0           | 0.050973                | 0.725473  | 0.000000  |
| 4             | 6             | 0           | 0.034216                | -0.686559 | 0.000001  |
| 5             | 6             | 0           | 1.237066                | -1.379748 | 0.000002  |
| 6             | 6             | 0           | 2.454520                | -0.711273 | 0.000002  |
| 7             | 1             | 0           | -1.144404               | 2.538244  | 0.000000  |
| 8             | 1             | 0           | 3.425022                | 1.211426  | 0.000000  |
| 9             | 1             | 0           | 1.301814                | 2.475014  | -0.000002 |
| 10            | 6             | 0           | -1.179093               | 1.454012  | -0.000001 |
| 11            | 6             | 0           | -1.270521               | -1.439598 | -0.000004 |
| 12            | 1             | 0           | 1.220634                | -2.466825 | 0.000002  |
| 13            | 1             | 0           | 3.382861                | -1.272986 | 0.000002  |
| 14            | 6             | 0           | -2.486919               | -0.577993 | 0.000001  |
| 15            | 6             | 0           | -2.409694               | 0.786258  | 0.000001  |
| 16            | 1             | 0           | -1.298995               | -2.117952 | -0.867831 |
| 17            | 1             | 0           | -3.454216               | -1.070457 | 0.000009  |
| 18            | 1             | 0           | -3.325480               | 1.370565  | 0.000005  |
| 19            | 1             | 0           | -1.299000               | -2.117963 | 0.867816  |

**Napthalene radical (iefpcm,thf)**

SCF Done: E(UAPFD) = -386.230381619  
Zero-point correction= 0.156241 (Hartree/Particle)  
Thermal correction to Energy= 0.163768  
Thermal correction to Enthalpy= 0.164712  
Thermal correction to Gibbs Free Energy= 0.123410  
Sum of electronic and zero-point Energies= -386.074141  
Sum of electronic and thermal Energies= -386.066614  
Sum of electronic and thermal Enthalpies= -386.065670  
Sum of electronic and thermal Free Energies= -386.106972

|               | E (Thermal)<br>KCal/Mol | CV<br>Cal/Mol-Kelvin | S<br>Cal/Mol-Kelvin |
|---------------|-------------------------|----------------------|---------------------|
| Total         | 102.766                 | 31.024               | 86.927              |
| Electronic    | 0.000                   | 0.000                | 1.377               |
| Translational | 0.889                   | 2.981                | 40.479              |
| Rotational    | 0.889                   | 2.981                | 29.015              |
| Vibrational   | 100.988                 | 25.062               | 16.055              |

Charge = 0 Multiplicity = 2 Standard orientation

| Center Number | Atomic Number | Atomic Type | Coordinates (Angstroms) |           |           |
|---------------|---------------|-------------|-------------------------|-----------|-----------|
|               |               |             | X                       | Y         | Z         |
| 1             | 6             | 0           | 2.478719                | 0.682670  | 0.000001  |
| 2             | 6             | 0           | 1.291548                | 1.389983  | -0.000001 |
| 3             | 6             | 0           | 0.050980                | 0.725880  | -0.000002 |
| 4             | 6             | 0           | 0.033608                | -0.687087 | 0.000000  |
| 5             | 6             | 0           | 1.237095                | -1.380976 | 0.000002  |
| 6             | 6             | 0           | 2.455408                | -0.712133 | 0.000003  |
| 7             | 1             | 0           | -1.144719               | 2.539955  | -0.000004 |
| 8             | 1             | 0           | 3.426586                | 1.211453  | 0.000002  |
| 9             | 1             | 0           | 1.303088                | 2.476249  | -0.000003 |
| 10            | 6             | 0           | -1.179418               | 1.455594  | -0.000004 |
| 11            | 6             | 0           | -1.271114               | -1.439995 | -0.000007 |
| 12            | 1             | 0           | 1.220057                | -2.467884 | 0.000004  |
| 13            | 1             | 0           | 3.383700                | -1.274075 | 0.000005  |
| 14            | 6             | 0           | -2.487275               | -0.578342 | 0.000005  |
| 15            | 6             | 0           | -2.410760               | 0.786774  | 0.000003  |
| 16            | 1             | 0           | -1.300421               | -2.119712 | -0.866249 |
| 17            | 1             | 0           | -3.454049               | -1.071769 | 0.000016  |
| 18            | 1             | 0           | -3.326557               | 1.371310  | 0.000010  |
| 19            | 1             | 0           | -1.300423               | -2.119736 | 0.866216  |

**Table S7. DFT Results for Biphenyl and Associated Radical**

**Biphenyl (gas)**

SCF Done: E(UAPFD) = -463.035608980  
 Zero-point correction= 0.181723 (Hartree/Particle)  
 Thermal correction to Energy= 0.190606  
 Thermal correction to Enthalpy= 0.191550  
 Thermal correction to Gibbs Free Energy= 0.147780  
 Sum of electronic and zero-point Energies= -462.853886  
 Sum of electronic and thermal Energies= -462.845003  
 Sum of electronic and thermal Enthalpies= -462.844059  
 Sum of electronic and thermal Free Energies= -462.887829

|               | E (Thermal)<br>KCal/Mol | CV<br>Cal/Mol-Kelvin | S<br>Cal/Mol-Kelvin |
|---------------|-------------------------|----------------------|---------------------|
| Total         | 119.607                 | 36.250               | 92.121              |
| Electronic    | 0.000                   | 0.000                | 0.000               |
| Translational | 0.889                   | 2.981                | 41.007              |
| Rotational    | 0.889                   | 2.981                | 29.041              |
| Vibrational   | 117.829                 | 30.289               | 22.073              |

Charge = 0 Multiplicity = 1 Standard orientation

| Center<br>Number | Atomic<br>Number | Atomic<br>Type | Coordinates (Angstroms) |           |           |
|------------------|------------------|----------------|-------------------------|-----------|-----------|
|                  |                  |                | X                       | Y         | Z         |
| 1                | 6                | 0              | 0.000000                | 0.737791  | 0.000000  |
| 2                | 6                | 0              | 0.424383                | 1.452865  | -1.122255 |
| 3                | 6                | 0              | 0.425040                | 2.840375  | -1.122774 |
| 4                | 6                | 0              | 0.000000                | 3.540017  | 0.000000  |
| 5                | 6                | 0              | -0.425040               | 2.840375  | 1.122774  |
| 6                | 6                | 0              | -0.424383               | 1.452865  | 1.122255  |
| 7                | 6                | 0              | 0.000000                | -0.737791 | 0.000000  |
| 8                | 6                | 0              | -0.424383               | -1.452865 | -1.122255 |
| 9                | 6                | 0              | -0.425040               | -2.840375 | -1.122774 |
| 10               | 6                | 0              | 0.000000                | -3.540017 | 0.000000  |
| 11               | 6                | 0              | 0.425040                | -2.840375 | 1.122774  |
| 12               | 6                | 0              | 0.424383                | -1.452865 | 1.122255  |
| 13               | 1                | 0              | 0.780753                | 0.912172  | -1.993378 |
| 14               | 1                | 0              | 0.767352                | 3.378292  | -2.001219 |
| 15               | 1                | 0              | 0.000000                | 4.625163  | 0.000000  |
| 16               | 1                | 0              | -0.767352               | 3.378292  | 2.001219  |
| 17               | 1                | 0              | -0.780753               | 0.912172  | 1.993379  |
| 18               | 1                | 0              | -0.780753               | -0.912172 | -1.993378 |
| 19               | 1                | 0              | -0.767352               | -3.378292 | -2.001219 |
| 20               | 1                | 0              | 0.000000                | -4.625163 | 0.000000  |
| 21               | 1                | 0              | 0.767352                | -3.378292 | 2.001219  |
| 22               | 1                | 0              | 0.780753                | -0.912172 | 1.993379  |

**Biphenyl (iefpcm, thf)**

SCF Done: E(UAPFD) = -463.039582016  
 Zero-point correction= 0.181716 (Hartree/Particle)  
 Thermal correction to Energy= 0.190591  
 Thermal correction to Enthalpy= 0.191535  
 Thermal correction to Gibbs Free Energy= 0.147140  
 Sum of electronic and zero-point Energies= -462.857866  
 Sum of electronic and thermal Energies= -462.848991  
 Sum of electronic and thermal Enthalpies= -462.848047  
 Sum of electronic and thermal Free Energies= -462.892442

|               | E (Thermal)<br>KCal/Mol | CV<br>Cal/Mol-Kelvin | S<br>Cal/Mol-Kelvin |
|---------------|-------------------------|----------------------|---------------------|
| Total         | 119.597                 | 36.238               | 93.438              |
| Electronic    | 0.000                   | 0.000                | 0.000               |
| Translational | 0.889                   | 2.981                | 41.007              |
| Rotational    | 0.889                   | 2.981                | 30.422              |
| Vibrational   | 117.820                 | 30.276               | 22.009              |

Charge = 0 Multiplicity = 1 Standard orientation

| Center<br>Number | Atomic<br>Number | Atomic<br>Type | Coordinates (Angstroms) |   |   |
|------------------|------------------|----------------|-------------------------|---|---|
|                  |                  |                | X                       | Y | Z |

|    |   |   |           |           |           |
|----|---|---|-----------|-----------|-----------|
| 1  | 6 | 0 | -0.738250 | 0.000000  | 0.000000  |
| 2  | 6 | 0 | -1.453873 | -1.128559 | -0.409527 |
| 3  | 6 | 0 | -2.842194 | -1.129004 | -0.410225 |
| 4  | 6 | 0 | -3.542415 | 0.000000  | 0.000000  |
| 5  | 6 | 0 | -2.842194 | 1.129004  | 0.410225  |
| 6  | 6 | 0 | -1.453873 | 1.128559  | 0.409527  |
| 7  | 6 | 0 | 0.738250  | 0.000000  | 0.000000  |
| 8  | 6 | 0 | 1.453873  | -1.128559 | 0.409527  |
| 9  | 6 | 0 | 2.842194  | -1.129004 | 0.410225  |
| 10 | 6 | 0 | 3.542415  | 0.000000  | 0.000000  |
| 11 | 6 | 0 | 2.842194  | 1.129004  | -0.410225 |
| 12 | 6 | 0 | 1.453873  | 1.128559  | -0.409527 |
| 13 | 1 | 0 | -0.915706 | -2.006719 | -0.752090 |
| 14 | 1 | 0 | -3.379737 | -2.012383 | -0.740170 |
| 15 | 1 | 0 | -4.627581 | 0.000000  | 0.000000  |
| 16 | 1 | 0 | -3.379737 | 2.012383  | 0.740170  |
| 17 | 1 | 0 | -0.915706 | 2.006719  | 0.752090  |
| 18 | 1 | 0 | 0.915706  | -2.006719 | 0.752090  |
| 19 | 1 | 0 | 3.379737  | -2.012383 | 0.740170  |
| 20 | 1 | 0 | 4.627581  | 0.000000  | 0.000000  |
| 21 | 1 | 0 | 3.379737  | 2.012383  | -0.740170 |
| 22 | 1 | 0 | 0.915706  | 2.006719  | -0.752090 |

**Biphenyl radical (gas)**

SCF Done: E(UAPFD) = -463.587605856  
 Zero-point correction= 0.190381 (Hartree/Particle)  
 Thermal correction to Energy= 0.199908  
 Thermal correction to Enthalpy= 0.200853  
 Thermal correction to Gibbs Free Energy= 0.154440  
 Sum of electronic and zero-point Energies= -463.397224  
 Sum of electronic and thermal Energies= -463.387697  
 Sum of electronic and thermal Enthalpies= -463.386753  
 Sum of electronic and thermal Free Energies= -463.433166

|               | E (Thermal)<br>KCal/Mol | CV<br>Cal/Mol-Kelvin | S<br>Cal/Mol-Kelvin |
|---------------|-------------------------|----------------------|---------------------|
| Total         | 125.444                 | 38.576               | 97.684              |
| Electronic    | 0.000                   | 0.000                | 1.377               |
| Translational | 0.889                   | 2.981                | 41.026              |
| Rotational    | 0.889                   | 2.981                | 30.504              |
| Vibrational   | 123.667                 | 32.614               | 24.777              |

Charge = 0 Multiplicity = 2 Standard orientation

| Center<br>Number | Atomic<br>Number | Atomic<br>Type | Coordinates (Angstroms) |           |           |
|------------------|------------------|----------------|-------------------------|-----------|-----------|
|                  |                  |                | X                       | Y         | Z         |
| 1                | 6                | 0              | 0.672314                | -0.000004 | -0.000012 |
| 2                | 6                | 0              | 1.416938                | -1.188224 | -0.263994 |
| 3                | 6                | 0              | 2.769659                | -1.211662 | -0.276634 |
| 4                | 6                | 0              | 3.593794                | 0.000003  | 0.000010  |
| 5                | 6                | 0              | 2.769655                | 1.211668  | 0.276640  |
| 6                | 6                | 0              | 1.416934                | 1.188217  | 0.263983  |
| 7                | 6                | 0              | -0.781203               | -0.000004 | -0.000004 |
| 8                | 6                | 0              | -1.512404               | -1.170281 | 0.268513  |
| 9                | 6                | 0              | -2.897023               | -1.168925 | 0.269436  |
| 10               | 6                | 0              | -3.601090               | 0.000004  | 0.000006  |
| 11               | 6                | 0              | -2.897019               | 1.168929  | -0.269430 |
| 12               | 6                | 0              | -1.512400               | 1.170277  | -0.268517 |
| 13               | 1                | 0              | 0.876603                | -2.099380 | -0.500205 |
| 14               | 1                | 0              | 3.291034                | -2.135718 | -0.508412 |
| 15               | 1                | 0              | 4.279165                | 0.190953  | -0.844375 |
| 16               | 1                | 0              | 3.291021                | 2.135729  | 0.508417  |
| 17               | 1                | 0              | 0.876590                | 2.099370  | 0.500187  |
| 18               | 1                | 0              | -0.984965               | -2.086224 | 0.511392  |
| 19               | 1                | 0              | -3.433286               | -2.086279 | 0.491740  |
| 20               | 1                | 0              | -4.686015               | 0.000006  | 0.000010  |
| 21               | 1                | 0              | -3.433279               | 2.086286  | -0.491732 |
| 22               | 1                | 0              | -0.984957               | 2.086216  | -0.511403 |

23 1 0 4.279153 -0.190945 0.844404

**Biphenyl radical (iefpcm, thf)**

SCF Done: E(UAPFD) = -463.591695813  
Zero-point correction= 0.190341 (Hartree/Particle)  
Thermal correction to Energy= 0.199866  
Thermal correction to Enthalpy= 0.200810  
Thermal correction to Gibbs Free Energy= 0.154381  
Sum of electronic and zero-point Energies= -463.401355  
Sum of electronic and thermal Energies= -463.391830  
Sum of electronic and thermal Enthalpies= -463.390886  
Sum of electronic and thermal Free Energies= -463.437315

|               | E (Thermal)<br>KCal/Mol | CV<br>Cal/Mol-Kelvin | S<br>Cal/Mol-Kelvin |
|---------------|-------------------------|----------------------|---------------------|
| Total         | 125.418                 | 38.582               | 97.719              |
| Electronic    | 0.000                   | 0.000                | 1.377               |
| Translational | 0.889                   | 2.981                | 41.026              |
| Rotational    | 0.889                   | 2.981                | 30.507              |
| Vibrational   | 123.640                 | 32.620               | 24.808              |

Charge = 0 Multiplicity = 2 Standard orientation

| Center<br>Number | Atomic<br>Number | Atomic<br>Type | Coordinates (Angstroms) |           |           |
|------------------|------------------|----------------|-------------------------|-----------|-----------|
|                  |                  |                | X                       | Y         | Z         |
| 1                | 6                | 0              | 0.672827                | 0.000000  | -0.000001 |
| 2                | 6                | 0              | 1.418573                | -1.193723 | -0.243460 |
| 3                | 6                | 0              | 2.772008                | -1.216142 | -0.255218 |
| 4                | 6                | 0              | 3.595438                | 0.000000  | 0.000003  |
| 5                | 6                | 0              | 2.772005                | 1.216142  | 0.255217  |
| 6                | 6                | 0              | 1.418571                | 1.193724  | 0.243458  |
| 7                | 6                | 0              | -0.780964               | 0.000000  | 0.000000  |
| 8                | 6                | 0              | -1.513933               | -1.175671 | 0.247687  |
| 9                | 6                | 0              | -2.899350               | -1.174127 | 0.248416  |
| 10               | 6                | 0              | -3.604545               | 0.000000  | 0.000001  |
| 11               | 6                | 0              | -2.899350               | 1.174127  | -0.248415 |
| 12               | 6                | 0              | -1.513933               | 1.175670  | -0.247687 |
| 13               | 1                | 0              | 0.881146                | -2.111242 | -0.460834 |
| 14               | 1                | 0              | 3.294044                | -2.144124 | -0.468914 |
| 15               | 1                | 0              | 4.282172                | 0.175870  | -0.845944 |
| 16               | 1                | 0              | 3.294040                | 2.144126  | 0.468908  |
| 17               | 1                | 0              | 0.881143                | 2.111243  | 0.460831  |
| 18               | 1                | 0              | -0.989620               | -2.098225 | 0.471023  |
| 19               | 1                | 0              | -3.435031               | -2.095924 | 0.453283  |
| 20               | 1                | 0              | -4.689504               | 0.000000  | 0.000001  |
| 21               | 1                | 0              | -3.435031               | 2.095924  | -0.453282 |
| 22               | 1                | 0              | -0.989620               | 2.098224  | -0.471025 |
| 23               | 1                | 0              | 4.282165                | -0.175870 | 0.845955  |

#### 14. References:

- (1) Imamoto Tsuneo; Ono Mitsumasa. The Reaction of Samarium(III) Iodide with Samarium Metal in Tetrahydrofuran, A New Method for the Preparation of Samarium(II) Iodide. *Chem. Lett.* **1987**, 16 (3), 501–502.
- (2) House, J. E. *Principles of Chemical Kinetics - 2nd Edition*; Academic Press: St. Louis, MO, 2007.
- (3) Espenson, J. H. *Chemical Kinetics, Reaction Mechanisms, and Chemical Equilibrium*; McGraw-Hill: New York, 1981.
- (4) Gaussian 09, Revision D.01, M. J. Frisch, G. W. Trucks, H. B. Schlegel, G. E. Scuseria, M. A. Robb, J. R. Cheeseman, G. Scalmani, V. Barone, B. Mennucci, G. A. Petersson, H. Nakatsuji, M. Caricato, X. Li, H. P. Hratchian, A. F. Izmaylov, J. Bloino, G. Zheng, J. L. Sonnenberg, M. Hada, M. Ehara, K. Toyota, R. Fukuda, J. Hasegawa, M. Ishida, T.

- Nakajima, Y. Honda, O. Kitao, H. Nakai, T. Vreven, J. A. Montgomery, Jr., J. E. Peralta, F. Ogliaro, M. Bearpark, J. J. Heyd, E. Brothers, K. N. Kudin, V. N. Staroverov, T. Keith, R. Kobayashi, J. Normand, K. Raghavachari, A. Rendell, J. C. Burant, S. S. Iyengar, J. Tomasi, M. Cossi, N. Rega, J. M. Millam, M. Klene, J. E. Knox, J. B. Cross, V. Bakken, C. Adamo, J. Jaramillo, R. Gomperts, R. E. Stratmann, O. Yazyev, A. J. Austin, R. Cammi, C. Pomelli, J. W. Ochterski, R. L. Martin, K. Morokuma, V. G. Zakrzewski, G. A. Voth, P. Salvador, J. J. Dannenberg, S. Dapprich, A. D. Daniels, O. Farkas, J. B. Foresman, J. V. Ortiz, J. Cioslowski, and D. J. Fox, Gaussian, Inc., Wallingford CT, 2013
- (5) Austin, A.; Petersson, G. A.; Frisch, M. J.; Dobek, F. J.; Scalmani, G.; Throssell, K. A Density Functional with Spherical Atom Dispersion Terms. *J. Chem. Theory Comput.* **2012**, *8* (12), 4989–5007.
  - (6) McLean, A. D.; Chandler, G. S. Contracted Gaussian Basis Sets for Molecular Calculations. I. Second Row Atoms, Z=11–18. *J. Chem. Phys.* **2008**, *72* (10), 5639.
  - (7) Krishnan, R.; Binkley, J. S.; Seeger, R.; Pople, J. A. Self-Consistent Molecular Orbital Methods. XX. A Basis Set for Correlated Wave Functions. *J. Chem. Phys.* **2008**, *72* (1), 650.
  - (8) Reed, A. E.; Weinstock, R. B.; Weinhold, F. Natural Population Analysis. *J. Chem. Phys.* **1998**, *83* (2), 735.
  - (9) Cancès, E.; Mennucci, B.; Tomasi, J. A New Integral Equation Formalism for the Polarizable Continuum Model: Theoretical Background and Applications to Isotropic and Anisotropic Dielectrics. *J. Chem. Phys.* **1998**, *107* (8), 3032.
  - (10) Tomasi, J.; Mennucci, B.; Cammi, R. Quantum Mechanical Continuum Solvation Models. *Chem. Rev.* **2005**, *105* (8), 2999–3093.
